# Supplementary material for: Solvatomorph and polymorph screening of clopamide drug and its copper(ii) complex crystals
Source: Royal Society of Chemistry journal article supplement (doi:10.1039/d1ce00995h), 2021-01-01
Supplement: d1ce00995h1.pdf [file d1ce00995h1.pdf]

## Supplementary information

**Table S1.** Crystal data and structure refinement of crystals **1** and **2**.

|                                                            | <b>1</b>                                                          | <b>2</b>                                                                                           |
|------------------------------------------------------------|-------------------------------------------------------------------|----------------------------------------------------------------------------------------------------|
| Crystal data                                               |                                                                   |                                                                                                    |
| Chemical formula                                           | C <sub>14</sub> H <sub>20</sub> ClN <sub>3</sub> O <sub>3</sub> S | C <sub>28</sub> H <sub>42</sub> Cl <sub>2</sub> N <sub>6</sub> O <sub>7</sub> S <sub>2</sub>       |
| Moiety formula                                             | C <sub>14</sub> H <sub>20</sub> ClN <sub>3</sub> O <sub>3</sub> S | (C <sub>14</sub> H <sub>20</sub> ClN <sub>3</sub> O <sub>3</sub> S) <sub>2</sub> ·H <sub>2</sub> O |
| Melting point                                              | 248.3 °C                                                          | 251.3 °C                                                                                           |
| M <sub>r</sub>                                             | 345.84                                                            | 709.69                                                                                             |
| Colour / Shape                                             | Colourless / Needle                                               | Colourless / Prism                                                                                 |
| Crystal size (mm)                                          | 0.5 x 0.1 x 0.1                                                   | 0.5 x 0.2 x 0.1                                                                                    |
| Crystal system, space group                                | Monoclinic, <i>P2<sub>1</sub>/n</i>                               | Monoclinic, <i>C2/c</i>                                                                            |
| Z, Z'                                                      | 8, 2                                                              | 4, 1                                                                                               |
| <i>a</i> (Å)                                               | 18.7914(4)                                                        | 14.5166(8)                                                                                         |
| <i>b</i> (Å)                                               | 9.2921(4)                                                         | 9.3747(7)                                                                                          |
| <i>c</i> (Å)                                               | 19.0621(4)                                                        | 24.7064(17)                                                                                        |
| α (°)                                                      | 90                                                                | 90                                                                                                 |
| β (°)                                                      | 99.322(7)                                                         | 100.965(2)                                                                                         |
| γ (°)                                                      | 90                                                                | 90                                                                                                 |
| V (Å <sup>3</sup> )                                        | 3284.51(18)                                                       | 3300.9(4)                                                                                          |
| D <sub>x</sub> (Mg m <sup>-3</sup> )                       | 1.399                                                             | 1.428                                                                                              |
| Radiation type                                             | Cu-Kα                                                             | Mo-Kα                                                                                              |
| μ (mm <sup>-1</sup> )                                      | 3.389                                                             | 0.377                                                                                              |
| Temperature (K)                                            | 128(2)                                                            | 103(2)                                                                                             |
| <i>F</i> (000)                                             | 1456                                                              | 1496                                                                                               |
| T <sub>min</sub> , T <sub>max</sub>                        | 0.919, 0.978                                                      | 0.8179, 0.9450                                                                                     |
| θ–range for data collection (°)                            | 3.063 ≤ θ ≤ 68.225                                                | 3.028 ≤ θ ≤ 27.485                                                                                 |
| Index ranges                                               | -22 ≤ <i>h</i> ≤ 22; -11 ≤ <i>k</i> ≤ 10;                         | -18 ≤ <i>h</i> ≤ 18; -12 ≤ <i>k</i> ≤ 12;                                                          |
| Reflections collected                                      | 42764                                                             | 45688                                                                                              |
| Completeness to 2θ                                         | 0.988                                                             | 0.998                                                                                              |
| Independent reflections                                    | 5936                                                              | 3762                                                                                               |
| R <sub>int</sub>                                           | 0.0740                                                            | 0.0564                                                                                             |
| Reflections <i>I</i> >2σ( <i>I</i> )                       | 5039                                                              | 3253                                                                                               |
| Data / restraints / parameters                             | 5936 / 0 / 401                                                    | 3762 / 0 / 210                                                                                     |
| Goodness-of-fit on <i>F</i> <sup>2</sup>                   | 1.214                                                             | 1.055                                                                                              |
| Final <i>R</i> indices [ <i>I</i> >2σ( <i>I</i> )]         | <i>R</i> 1 = 0.0998, <i>wR</i> 2 = 0.2229                         | <i>R</i> 1 = 0.0440, <i>wR</i> 2 = 0.1076                                                          |
| <i>R</i> indices (all data)                                | <i>R</i> 1 = 0.1199, <i>wR</i> 2 = 0.2315                         | <i>R</i> 1 = 0.0510, <i>wR</i> 2 = 0.1122                                                          |
| Max. and mean shift/esd                                    | 0.000; 0.000                                                      | 0.000; 0.000                                                                                       |
| Δρ <sub>max</sub> , Δρ <sub>min</sub> (e Å <sup>-3</sup> ) | 0.617, -0.494                                                     | 0.376, -0.412                                                                                      |

**Table S2.** Comparison of bond lengths (Å) in the Clopamide molecules in crystals **1** and **2**.

| <b>1A</b> |          | <b>1B</b> |          | <b>2</b> |          |
|-----------|----------|-----------|----------|----------|----------|
| Cl1-C3    | 1.733(7) | Cl2-C23   | 1.730(7) | Cl1-C3   | 1.727(2) |
| S1-O2     | 1.427(5) | S2-O5     | 1.431(5) | S1-O2    | 1.436(1) |
| S1-C2     | 1.790(7) | S2-C22    | 1.782(7) | S1-C2    | 1.788(2) |
| S1-O1     | 1.416(5) | S2-O4     | 1.425(5) | S1-O1    | 1.429(1) |
| S1-N1     | 1.599(6) | S2-N2     | 1.605(6) | S1-N1    | 1.601(2) |
| C1-C2     | 1.378(9) | C21-C22   | 1.383(9) | C1-C2    | 1.393(2) |
| C2-C3     | 1.41(1)  | C22-C23   | 1.38(1)  | C2-C3    | 1.398(3) |
| C3-C4     | 1.38(1)  | C23-C24   | 1.40(1)  | C3-C4    | 1.392(3) |
| C4-C5     | 1.377(9) | C24-C25   | 1.372(9) | C4-C5    | 1.385(3) |
| C5-C6     | 1.402(9) | C25-C26   | 1.400(9) | C5-C6    | 1.393(3) |
| C6-C1     | 1.377(9) | C26-C21   | 1.374(9) | C6-C1    | 1.393(3) |
| C6-C7     | 1.493(9) | C26-C27   | 1.503(9) | C6-C7    | 1.508(3) |
| C7-O3     | 1.232(8) | C27-O6    | 1.222(8) | C7-O3    | 1.219(3) |
| C7-N8     | 1.339(9) | C27-N28   | 1.344(9) | C7-C8    | 1.338(3) |
| N8-N9     | 1.423(7) | N28-N29   | 1.412(7) | N8-N9    | 1.414(2) |
| N9-C10    | 1.475(9) | N29-C30   | 1.493(9) | N9-C10   | 1.485(3) |
| C10-C11   | 1.518(9) | C30-C31   | 1.53(1)  | C10-C16  | 1.520(3) |
| C11-C12   | 1.52(1)  | C31-C32   | 1.52(1)  | C11-C12  | 1.505(5) |
| C12-C13   | 1.52(1)  | C32-C33   | 1.52(1)  | C12-C13  | 1.505(5) |
| C13-C14   | 1.53(1)  | C33-C34   | 1.53(1)  | C13-C14  | 1.517(4) |
| C14-C15   | 1.52(1)  | C34-C35   | 1.51(1)  | C14-C15  | 1.517(4) |
| C14-N9    | 1.492(9) | C34-N29   | 1.488(9) | C14-N9   | 1.491(3) |
| C10-C16   | 1.52(1)  | C30-C36   | 1.51(1)  | C10-C11  | 1.519(3) |

**Table S3.** Comparison of bond angles (°) in the Clopamide molecules in crystals **1** and **2**.

| <b>1A</b>   |          | <b>1B</b>    |          | <b>2</b>    |           |
|-------------|----------|--------------|----------|-------------|-----------|
| S1-O1-O2    | 118.2(3) | S2-O4-O5     | 118.1(3) | S1-O1-O2    | 119.06(8) |
| S1-O1-N1    | 109.2(3) | S2-O4-N2     | 109.3(3) | S1-O1-N1    | 108.37(9) |
| S1-O2-N1    | 107.8(3) | S2-O5-N2     | 107.6(3) | S1-O2-N1    | 107.53(8) |
| S1-N1-C2    | 107.7(3) | S2-N2-C22    | 106.1(3) | S1-N1-C2    | 107.20(8) |
| S1-O1-C2    | 105.1(3) | S2-O4-C22    | 105.6(3) | S1-O1-C2    | 105.27(8) |
| S1-O2-C2    | 108.4(3) | S2-O5-C22    | 109.6(3) | S1-O2-C2    | 108.87(8) |
| S1-C1-C2    | 117.1(5) | S2-C21-C22   | 116.9(5) | S1-C1-C2    | 117.2(1)  |
| S1-C2-C3    | 123.8(5) | S2-C22-C23   | 124.0(5) | S1-C2-C3    | 123.7(1)  |
| Cl1-C2-C3   | 121.4(5) | Cl2-C22-C23  | 122.2(5) | Cl1-C2-C3   | 121.3(1)  |
| Cl1-C3-Cl4  | 118.7(5) | Cl2-C23-Cl24 | 117.6(5) | Cl1-C3-Cl4  | 118.2(2)  |
| C1-C2-C3    | 119.0(6) | C21-C22-C23  | 119.0(6) | C1-C2-C3    | 119.1(2)  |
| C2-C3-C4    | 119.9(6) | C22-C23-C24  | 120.2(6) | C2-C3-C4    | 120.5(2)  |
| C3-C4-C5    | 120.3(6) | C23-C24-C25  | 119.8(6) | C3-C4-C5    | 120.0(2)  |
| C4-C5-C6    | 120.1(6) | C24-C25-C26  | 120.3(6) | C4-C5-C6    | 120.1(2)  |
| C5-C6-C1    | 119.3(6) | C25-C26-C21  | 118.9(6) | C5-C6-C1    | 119.8(2)  |
| C6-C1-C2    | 121.3(6) | C26-C21-C22  | 121.7(6) | C6-C1-C2    | 120.5(2)  |
| C1-C6-C7    | 121.5(6) | C21-C26-C27  | 122.7(6) | C1-C6-C7    | 121.3(2)  |
| C5-C6-C7    | 119.2(6) | C25-C26-C27  | 118.4(6) | C5-C6-C7    | 118.8(2)  |
| C6-C7-O3    | 121.1(7) | C26-C27-O6   | 121.4(6) | C6-C7-O3    | 121.9(2)  |
| C6-C7-N8    | 114.4(6) | C26-C27-N28  | 113.8(6) | C6-C7-N8    | 114.4(2)  |
| C7-N8-O3    | 124.5(6) | C27-N28-O6   | 124.8(6) | C7-N8-O3    | 123.6(2)  |
| C7-N8-N9    | 120.9(6) | C27-N28-N29  | 121.1(6) | C7-N8-N9    | 121.6(2)  |
| N8-N9-C10   | 107.9(5) | N28-N29-C30  | 107.0(5) | N8-N9-C10   | 107.3(2)  |
| N8-N9-C14   | 107.0(5) | N28-N29-C34  | 108.7(5) | N8-N9-C14   | 107.7(2)  |
| N9-C10-C11  | 109.8(6) | N29-C30-C31  | 108.8(6) | N9-C10-C11  | 109.2(2)  |
| N9-C10-C14  | 111.7(6) | N29-C30-C34  | 113.1(6) | N9-C10-C14  | 111.5(2)  |
| N9-C10-C16  | 110.0(6) | N29-C30-C36  | 111.3(6) | N9-C10-C16  | 110.5(2)  |
| N9-C13-C14  | 109.9(6) | N29-C33-C34  | 108.8(6) | N9-C13-C14  | 108.8(2)  |
| N9-C14-C15  | 111.1(6) | N29-C34-C35  | 110.1(6) | N9-C14-C15  | 110.2(2)  |
| C10-C11-C12 | 112.5(6) | C30-C31-C32  | 112.6(6) | C10-C11-C12 | 112.4(2)  |
| C10-C11-C16 | 110.6(6) | C30-C31-C36  | 110.4(6) | C10-C11-C16 | 111.0(2)  |
| C11-C12-C13 | 109.9(7) | C31-C32-C33  | 109.0(7) | C11-C12-C13 | 110.3(2)  |
| C12-C13-C14 | 110.3(6) | C32-C33-C34  | 110.2(6) | C12-C13-C14 | 111.7(2)  |
| C11-C12-C13 | 109.9(6) | C33-C34-C35  | 111.1(6) | C13-C14-C15 | 112.2(3)  |

**Table S4.** Selected hydrogen, halogen and chalcogen bond distances (Å) and angles (°) in crystals **1** and **2**

| <i>D—H...A</i>                          | <i>D—H</i> | <i>H...A</i> | <i>D...A</i> | <i>D—H...A</i> | Symmetry codes       |
|-----------------------------------------|------------|--------------|--------------|----------------|----------------------|
| <b>1</b>                                |            |              |              |                |                      |
| <i>N1—H1A...N9</i> <sup>(i)</sup>       | 0.80       | 2.47         | 3.213(9)     | 154            | 3/2-x, 1/2+y, 1/2-z  |
| <i>N1—H1B...O2</i> <sup>(ii)</sup>      | 0.87       | 2.13         | 2.942(8)     | 155            | 2-x, 1-y, 1-z        |
| <i>N2—H2A...O5</i> <sup>(iii)</sup>     | 0.92       | 2.06         | 2.959(7)     | 165            | -x, -y, -z           |
| <i>N2—H2B...N29</i> <sup>(iv)</sup>     | 0.99       | 2.29         | 3.204(8)     | 153            | 1/2-x, -1/2+y, 1/2-z |
| <i>C10-H10...Ph</i> <sub>C1-C6</sub>    | 1.00       | 2.56         | 3.544(8)     | 168            | 3/2-X,1/2+Y,1/2-Z    |
| <i>C15-H15A...Ph</i> <sub>C1-C6</sub>   | 0.98       | 3.00         | 3.884(9)     | 151            | 3/2-X,-1/2+Y,1/2-Z   |
| <i>C30-H30...Ph</i> <sub>C21-C26</sub>  | 1.00       | 2.50         | 3.466(8)     | 163            | 1/2-X,-1/2+Y,1/2-Z   |
| <i>C35-H35A...Ph</i> <sub>C21-C26</sub> | 0.98       | 2.89         | 3.798(9)     | 154            | 1/2-X,1/2+Y,1/2-Z    |
| <i>Cl1...O2 halogen bond</i>            |            |              | 3.148(6)     |                | intra                |
| <i>O3...O1 chalcogen bond</i>           |            |              | 3.036(7)     |                | 3/2-x,-1/2+y,1/2-z   |
| <i>Cl2...O5 halogen bond</i>            |            |              | 3.096(4)     |                | intra                |
| <i>O6...O4 chalcogen bond</i>           |            |              | 3.233(7)     |                | 1/2-x,1/2+y,1/2-z    |
| <b>2</b>                                |            |              |              |                |                      |
| <i>N1—H1A...N9</i> <sup>(i)</sup>       | 0.84       | 2.33         | 3.094(2)     | 151            | 1/2-x, 1/2+y, 1/2-z  |
| <i>N1—H1B...O2</i> <sup>(ii)</sup>      | 0.86       | 2.32         | 3.169(2)     | 167            | 1/2-x, 1/2-y, 1-z    |
| <i>O7—H7A...O3</i> <sup>(i)</sup>       | 0.87       | 2.01         | 2.762(5)     | 145            | 1/2-x, 1/2+y, 1/2-z  |
| <i>O7—H7B...O1</i> <sup>(iii)</sup>     | 0.87       | 2.27         | 3.054(4)     | 150            | -x, y, 1/2-z         |
| <i>N8—H8...O7</i>                       | 0.86       | 2.56         | 3.195(5)     | 131            |                      |
| <i>C10-H10...Ph</i> <sub>C1-C6</sub>    | 1.00       | 2.58         | 3.530(2)     | 159            | 1/2-X,1/2+Y,1/2-Z    |
| <i>C15-H15B...Ph</i> <sub>C1-C6</sub>   | 0.98       | 2.75         | 3.634(3)     | 151            | 1/2-X,-1/2+Y,1/2-Z   |
| <i>Cl1...O2 halogen bond</i>            |            |              | 3.0581(16)   |                | intra                |

**Table S5.** Crystal data and refinement parameters of crystals **3-6**

|                                                            | <b>3</b>                                                                                                                                                              | <b>4</b>                                                                                                                                                                            | <b>5</b>                                                                                                                                                                            | <b>6</b>                                                                                                                                                                            |
|------------------------------------------------------------|-----------------------------------------------------------------------------------------------------------------------------------------------------------------------|-------------------------------------------------------------------------------------------------------------------------------------------------------------------------------------|-------------------------------------------------------------------------------------------------------------------------------------------------------------------------------------|-------------------------------------------------------------------------------------------------------------------------------------------------------------------------------------|
| Crystal data                                               |                                                                                                                                                                       |                                                                                                                                                                                     |                                                                                                                                                                                     |                                                                                                                                                                                     |
| Chemical formula                                           | C <sub>30</sub> H <sub>50</sub> Cl <sub>2</sub> CuN <sub>6</sub> O <sub>10</sub> S <sub>2</sub>                                                                       | C <sub>32</sub> H <sub>54</sub> Cl <sub>2</sub> CuN <sub>6</sub> O <sub>10</sub> S <sub>2</sub>                                                                                     | C <sub>34</sub> H <sub>58</sub> Cl <sub>2</sub> CuN <sub>6</sub> O <sub>10</sub> S <sub>2</sub>                                                                                     | C <sub>34</sub> H <sub>58</sub> Cl <sub>2</sub> CuN <sub>6</sub> O <sub>10</sub> S <sub>2</sub>                                                                                     |
| Moiety formula                                             | C <sub>28</sub> H <sub>38</sub> Cl <sub>2</sub> CuN <sub>6</sub> O <sub>6</sub> S <sub>2</sub> ·<br>(CH <sub>4</sub> O) <sub>2</sub> ·(H <sub>2</sub> O) <sub>2</sub> | C <sub>28</sub> H <sub>38</sub> Cl <sub>2</sub> CuN <sub>6</sub> O <sub>6</sub> S <sub>2</sub> ·<br>(C <sub>2</sub> H <sub>6</sub> O) <sub>2</sub> ·(H <sub>2</sub> O) <sub>2</sub> | C <sub>28</sub> H <sub>38</sub> Cl <sub>2</sub> CuN <sub>6</sub> O <sub>6</sub> S <sub>2</sub> ·<br>(C <sub>3</sub> H <sub>8</sub> O) <sub>2</sub> ·(H <sub>2</sub> O) <sub>2</sub> | C <sub>28</sub> H <sub>38</sub> Cl <sub>2</sub> CuN <sub>6</sub> O <sub>6</sub> S <sub>2</sub> ·<br>(C <sub>3</sub> H <sub>8</sub> O) <sub>2</sub> ·(H <sub>2</sub> O) <sub>2</sub> |
| Melting point                                              | No evident melting endotherm                                                                                                                                          | 231.8 °C                                                                                                                                                                            | 229.3 °C                                                                                                                                                                            | 239.925 °C                                                                                                                                                                          |
| M <sub>r</sub>                                             | 853.32                                                                                                                                                                | 881.37                                                                                                                                                                              | 909.42                                                                                                                                                                              | 909.42                                                                                                                                                                              |
| Colour / Shape                                             | Brown / Prism                                                                                                                                                         | Brown / Prism                                                                                                                                                                       | Brown / Platelet                                                                                                                                                                    | Brown / Platelet                                                                                                                                                                    |
| Crystal size (mm)                                          | 0.5 x 0.25 x 0.25                                                                                                                                                     | 0.3 x 0.1 x 0.1                                                                                                                                                                     | 0.5 x 0.25 x 0.05                                                                                                                                                                   | 0.5 x 0.5 x 0.05                                                                                                                                                                    |
| Crystal system, space group                                | Triclinic, <i>P</i> $\bar{1}$                                                                                                                                         | Triclinic, <i>P</i> $\bar{1}$                                                                                                                                                       | Triclinic, <i>P</i> $\bar{1}$                                                                                                                                                       | Triclinic, <i>P</i> $\bar{1}$                                                                                                                                                       |
| Z, Z'                                                      | 1, 0.5                                                                                                                                                                | 1, 0.5                                                                                                                                                                              | 1, 0.5                                                                                                                                                                              | 1, 0.5                                                                                                                                                                              |
| <i>a</i> (Å)                                               | 7.7518(3)                                                                                                                                                             | 8.2195(7)                                                                                                                                                                           | 8.404(4)                                                                                                                                                                            | 8.3107(14)                                                                                                                                                                          |
| <i>b</i> (Å)                                               | 8.0901(4)                                                                                                                                                             | 8.2439(7)                                                                                                                                                                           | 8.497(5)                                                                                                                                                                            | 8.7469(14)                                                                                                                                                                          |
| <i>c</i> (Å)                                               | 16.3683(7)                                                                                                                                                            | 16.4822(14)                                                                                                                                                                         | 16.310(8)                                                                                                                                                                           | 16.387(3)                                                                                                                                                                           |
| α (°)                                                      | 83.1130(10)                                                                                                                                                           | 85.598(2)                                                                                                                                                                           | 79.445(10)                                                                                                                                                                          | 79.713(5)                                                                                                                                                                           |
| β (°)                                                      | 78.8210(10)                                                                                                                                                           | 78.212(2)                                                                                                                                                                           | 83.113(12)                                                                                                                                                                          | 87.099(4)                                                                                                                                                                           |
| γ (°)                                                      | 71.6590(10)                                                                                                                                                           | 68.273(2)                                                                                                                                                                           | 67.366(10)                                                                                                                                                                          | 65.629(4)                                                                                                                                                                           |
| V (Å <sup>3</sup> )                                        | 953.96(7)                                                                                                                                                             | 1015.62(15)                                                                                                                                                                         | 1055.2(10)                                                                                                                                                                          | 1067.3(3)                                                                                                                                                                           |
| D <sub>x</sub> (Mg m <sup>-3</sup> )                       | 1.485                                                                                                                                                                 | 1.441                                                                                                                                                                               | 1.431                                                                                                                                                                               | 1.415                                                                                                                                                                               |
| Radiation type                                             | Mo-Kα                                                                                                                                                                 | Mo-Kα                                                                                                                                                                               | Mo-Kα                                                                                                                                                                               | Mo-Kα                                                                                                                                                                               |
| μ (mm <sup>-1</sup> )                                      | 0.883                                                                                                                                                                 | 0.831                                                                                                                                                                               | 0.803                                                                                                                                                                               | 0.794                                                                                                                                                                               |
| Temperature (K)                                            | 103(2)                                                                                                                                                                | 103(2)                                                                                                                                                                              | 103(2)                                                                                                                                                                              | 103(2)                                                                                                                                                                              |
| <i>F</i> (000)                                             | 447                                                                                                                                                                   | 463                                                                                                                                                                                 | 479                                                                                                                                                                                 | 479                                                                                                                                                                                 |
| T <sub>min</sub> , T <sub>max</sub>                        | 0.7746, 0.9182                                                                                                                                                        | 0.7534, 0.8767                                                                                                                                                                      | 0.6700, 0.9604                                                                                                                                                                      | 0.5771, 1.0000                                                                                                                                                                      |
| θ-range for data collection (°)                            | 3.018 ≤ θ ≤ 32.525                                                                                                                                                    | 3.035 ≤ θ ≤ 27.478                                                                                                                                                                  | 2.989 ≤ θ ≤ 25.348                                                                                                                                                                  | 3.003 ≤ θ ≤ 28.698                                                                                                                                                                  |
| Index ranges                                               | -11 ≤ <i>h</i> ≤ 11; -12 ≤ <i>k</i> ≤ 12; -24 ≤<br><i>l</i> ≤ 24                                                                                                      | -10 ≤ <i>h</i> ≤ 10; -10 ≤ <i>k</i> ≤ 10; -21 ≤<br><i>l</i> ≤ 21                                                                                                                    | -10 ≤ <i>h</i> ≤ 10; -10 ≤ <i>k</i> ≤ 10; -19 ≤<br><i>l</i> ≤ 19                                                                                                                    | -11 ≤ <i>h</i> ≤ 11; -11 ≤ <i>k</i> ≤ 11; -22<br>≤ <i>l</i> ≤ 22                                                                                                                    |
| Reflections collected                                      | 41399                                                                                                                                                                 | 43872                                                                                                                                                                               | 16943                                                                                                                                                                               | 51848                                                                                                                                                                               |
| Completeness to 2θ                                         | 0.998                                                                                                                                                                 | 0.998                                                                                                                                                                               | 0.997                                                                                                                                                                               | 0.998                                                                                                                                                                               |
| Independent reflections                                    | 6813                                                                                                                                                                  | 4634                                                                                                                                                                                | 3846                                                                                                                                                                                | 5523                                                                                                                                                                                |
| R <sub>int</sub>                                           | 0.0600                                                                                                                                                                | 0.0918                                                                                                                                                                              | 0.1536                                                                                                                                                                              | 0.0884                                                                                                                                                                              |
| Reflections <i>I</i> > 2σ( <i>I</i> )                      | 5424                                                                                                                                                                  | 3687                                                                                                                                                                                | 2585                                                                                                                                                                                | 4481                                                                                                                                                                                |
| Data / restraints / parameters                             | 6813 / 0 / 236                                                                                                                                                        | 4634 / 0 / 244                                                                                                                                                                      | 3846 / 0 / 253                                                                                                                                                                      | 5523 / 0 / 368                                                                                                                                                                      |
| Goodness-of-fit on <i>F</i> <sup>2</sup>                   | 1.102                                                                                                                                                                 | 1.094                                                                                                                                                                               | 1.069                                                                                                                                                                               | 1.099                                                                                                                                                                               |
| Final <i>R</i> indices [ <i>I</i> > 2σ( <i>I</i> )]        | <i>R</i> 1 = 0.0472, <i>wR</i> 2 = 0.1021                                                                                                                             | <i>R</i> 1 = 0.0972, <i>wR</i> 2 = 0.2386                                                                                                                                           | <i>R</i> 1 = 0.0849, <i>wR</i> 2 = 0.2092                                                                                                                                           | <i>R</i> 1 = 0.0690, <i>wR</i> 2 = 0.1530                                                                                                                                           |
| <i>R</i> indices (all data)                                | <i>R</i> 1 = 0.0684, <i>wR</i> 2 = 0.1284                                                                                                                             | <i>R</i> 1 = 0.1179, <i>wR</i> 2 = 0.2561                                                                                                                                           | <i>R</i> 1 = 0.1143, <i>wR</i> 2 = 0.2328                                                                                                                                           | <i>R</i> 1 = 0.0816, <i>wR</i> 2 = 0.1599                                                                                                                                           |
| Max. and mean shift/esd                                    | 0.000; 0.000                                                                                                                                                          | 0.000; 0.000                                                                                                                                                                        | 0.000; 0.000                                                                                                                                                                        | 0.000; 0.000                                                                                                                                                                        |
| Δρ <sub>max</sub> , Δρ <sub>min</sub> (e Å <sup>-3</sup> ) | 0.832, -0.888                                                                                                                                                         | 1.573, -1.098                                                                                                                                                                       | 0.852, -0.963                                                                                                                                                                       | 0.644, -0.708                                                                                                                                                                       |

**Table S6.** Selected interatomic distances (Å) and angles (°) for the coordination sphere in crystals **3-10**

| Crystal number | Distance of Cu-O3 | Distance of Cu-N9 | Distance of Cu-O6 | Distance of Cu-N29 | Angle of O3-Cu-N9 | Angle of O6-Cu-N29 |
|----------------|-------------------|-------------------|-------------------|--------------------|-------------------|--------------------|
| <b>3</b>       | 1.916(1)          | 2.019(2)          |                   |                    | 83.49(7)          |                    |
| <b>4</b>       | 1.909(4)          | 1.997(6)          |                   |                    | 83.5(2)           |                    |
| <b>5</b>       | 1.906(4)          | 1.994(6)          |                   |                    | 83.6(2)           |                    |
| <b>6</b>       | 1.904(2)          | 2.006(4)          |                   |                    | 83.4(1)           |                    |
| <b>7</b>       | 1.922(8)          | 2.01(1)           | 1.923(8)          | 2.02(1)            | 83.0(4)           | 83.1(4)            |
| <b>8A</b>      | 1.878(4)          | 2.070(5)          | 1.863(4)          | 2.057(5)           | 82.6(2)           | 83.0(2)            |
| <b>8B</b>      | 1.874(3)          | 2.072(4)          |                   |                    | 82.6(2)           |                    |
| <b>8C</b>      |                   |                   | 1.875(4)          | 2.078(5)           |                   | 82.6(2)            |
| <b>9</b>       | 1.866(5)          | 2.041(6)          |                   |                    | 82.3(2)           |                    |
| <b>10</b>      | 1.876(6)          | 2.061(1)          |                   |                    | 83.0(3)           |                    |

**Table S7.** Cell similarity indexes calculated for pairs of **3-6** isostructural crystals

|          | 4    | 5    | 6    |
|----------|------|------|------|
| <b>3</b> | 0.02 | 0.03 | 0.04 |
| <b>4</b> | -    | 0.01 | 0.01 |
| <b>5</b> | -    | -    | 0.01 |

**Table S8.** Selected N/O-H...O/N hydrogen bond distances and angles of crystals **3-6**

|                  | D-H (Å) | H...A (Å) | D...A (Å) | D-H...A (°) | Symmetry codes |
|------------------|---------|-----------|-----------|-------------|----------------|
| N1-H1A...O8      |         |           |           |             |                |
| Crystal <b>3</b> | 0,84    | 2,11      | 2.883(2)  | 154         | 1-x, 1-y, -z   |
| Crystal <b>4</b> | 0,89    | 2,14      | 2.976(6)  | 156         | 1-x, -y, -z    |
| Crystal <b>5</b> | 0,91    | 1,93      | 2.807(6)  | 160         | 1-x, 1-y, -z   |
| Crystal <b>6</b> | 0.77(5) | 2.10(5)   | 2.868(4)  | 175(5)      | 1-x, 1-y, -z   |
| N1-H1B...O8      |         |           |           |             |                |
| Crystal <b>3</b> | 0,76    | 2,10      | 2.861(3)  | 172         | x, -1+y, z     |
| Crystal <b>4</b> | 0,88    | 1,99      | 2.862(7)  | 174         |                |
| Crystal <b>5</b> | 0,87    | 2,02      | 2.831(6)  | 155         | -1+x, y, z     |
| Crystal <b>6</b> | 0.91(3) | 2.15(3)   | 3.001(4)  | 156(4)      | -1+x, y, z     |
| O8-H8...O7       |         |           |           |             |                |
| Crystal <b>3</b> | 0,82    | 1,83      | 2.642(2)  | 170         |                |
| Crystal <b>4</b> | 0,84    | 1,85      | 2.673(6)  | 168         | x, -1+y, z     |
| Crystal <b>5</b> | 0,81    | 1,72      | 2.532(6)  | 176         |                |
| Crystal <b>6</b> | 0,84    | 1,88      | 2.708(4)  | 170         |                |
| O7-H7B...O2      |         |           |           |             |                |
| Crystal <b>3</b> | 0,81    | 2,06      | 2.871(2)  | 173         | 1+x, y, z      |
| Crystal <b>4</b> | 0,84    | 2,13      | 2.915(6)  | 156         | 1+x, y, z      |
| Crystal <b>5</b> | 0,86    | 2,00      | 2.833(6)  | 163         | x, 1+y, z      |
| Crystal <b>6</b> | 0.83(4) | 2.04(5)   | 2.859(4)  | 169(4)      | x, 1+y, z      |
| O7-H7A...N8      |         |           |           |             |                |
| Crystal <b>3</b> | 0,82    | 2,02      | 2.846(3)  | 175         |                |
| Crystal <b>4</b> | 0,84    | 2,02      | 2.857(7)  | 177         |                |
| Crystal <b>5</b> | 0,86    | 2,09      | 2.938(6)  | 168         |                |
| Crystal <b>6</b> | 0.84(2) | 2.05(2)   | 2.885(4)  | 173(4)      |                |

**Table S9.** Crystal data and refinement parameters of crystals **7-10**

|                                                                | <b>7</b>                                                                                       | <b>8</b>                                                                                       | <b>9</b>                                                                                       | <b>10</b>                                                                                                                                       |
|----------------------------------------------------------------|------------------------------------------------------------------------------------------------|------------------------------------------------------------------------------------------------|------------------------------------------------------------------------------------------------|-------------------------------------------------------------------------------------------------------------------------------------------------|
| Chemical formula                                               | C <sub>28</sub> H <sub>38</sub> Cl <sub>2</sub> CuN <sub>6</sub> O <sub>6</sub> S <sub>2</sub> | C <sub>28</sub> H <sub>38</sub> Cl <sub>2</sub> CuN <sub>6</sub> O <sub>6</sub> S <sub>2</sub> | C <sub>28</sub> H <sub>38</sub> Cl <sub>2</sub> CuN <sub>6</sub> O <sub>6</sub> S <sub>2</sub> | C <sub>30</sub> H <sub>42</sub> Cl <sub>6</sub> CuN <sub>6</sub> O <sub>10</sub> S <sub>2</sub>                                                 |
| Moiety formula                                                 | C <sub>28</sub> H <sub>38</sub> Cl <sub>2</sub> CuN <sub>6</sub> O <sub>6</sub> S <sub>2</sub> | C <sub>28</sub> H <sub>38</sub> Cl <sub>2</sub> CuN <sub>6</sub> O <sub>6</sub> S <sub>2</sub> | C <sub>28</sub> H <sub>38</sub> Cl <sub>2</sub> CuN <sub>6</sub> O <sub>6</sub> S <sub>2</sub> | C <sub>28</sub> H <sub>38</sub> Cl <sub>2</sub> CuN <sub>6</sub> O <sub>6</sub> S <sub>2</sub> ·(CH <sub>2</sub> Cl <sub>2</sub> ) <sub>2</sub> |
| Melting point                                                  | 222.6 °C                                                                                       | 245.4 °C                                                                                       | 240.4 °C                                                                                       | -                                                                                                                                               |
| M <sub>r</sub>                                                 | 753.20                                                                                         | 753.20                                                                                         | 753.20                                                                                         | 923.05                                                                                                                                          |
| Colour / Shape                                                 | Brown / Chunk                                                                                  | Brown / Chunk                                                                                  | Brown / Chunk                                                                                  | Brown / Prism                                                                                                                                   |
| Crystal size (mm)                                              | 0.2 x 0.1 x 0.05                                                                               | 0.1 x 0.1 x 0.1                                                                                | 0.1 x 0.1 x 0.05                                                                               | 0.25 x 0.15 x 0.1                                                                                                                               |
| Crystal system, space group                                    | Triclinic, <i>P</i> $\bar{1}$                                                                  | Triclinic, <i>P</i> $\bar{1}$                                                                  | Trigonal, <i>R</i> $\bar{3}$                                                                   | Monoclinic, <i>C2/c</i>                                                                                                                         |
| Z, Z'                                                          | 2                                                                                              | 4                                                                                              | 9                                                                                              | 4                                                                                                                                               |
| <i>a</i> (Å)                                                   | 7.8247(14)                                                                                     | 13.4600(10)                                                                                    | 23.078(3)                                                                                      | 26.699(2)                                                                                                                                       |
| <i>b</i> (Å)                                                   | 13.829(2)                                                                                      | 15.2424(11)                                                                                    | 23.078(3)                                                                                      | 9.8941(8)                                                                                                                                       |
| <i>c</i> (Å)                                                   | 15.156(3)                                                                                      | 18.1855(16)                                                                                    | 18.3291(12)                                                                                    | 15.6876(14)                                                                                                                                     |
| $\alpha$ (°)                                                   | 78.981(4)                                                                                      | 114.627(6)                                                                                     | 90                                                                                             | 90                                                                                                                                              |
| $\beta$ (°)                                                    | 81.309(4)                                                                                      | 93.362(8)                                                                                      | 90                                                                                             | 104.750(7)                                                                                                                                      |
| $\gamma$ (°)                                                   | 85.041(4)                                                                                      | 90.021(6)                                                                                      | 120                                                                                            | 90                                                                                                                                              |
| V (Å <sup>3</sup> )                                            | 1588.5(5)                                                                                      | 3384.5(5)                                                                                      | 8454(2)                                                                                        | 4007.5(6)                                                                                                                                       |
| D <sub>x</sub> (Mg m <sup>-3</sup> )                           | 1.575                                                                                          | 1.478                                                                                          | 1.331                                                                                          | 1.530                                                                                                                                           |
| Radiation type                                                 | Mo-K $\alpha$                                                                                  | Mo-K $\alpha$                                                                                  | Cu-K $\alpha$                                                                                  | Cu-K $\alpha$                                                                                                                                   |
| $\mu$ (mm <sup>-1</sup> )                                      | 1.040                                                                                          | 0.976                                                                                          | 3.544                                                                                          | 5.833                                                                                                                                           |
| Temperature (K)                                                | 103(2)                                                                                         | 123(2)                                                                                         | 153(2)                                                                                         | 128(2)                                                                                                                                          |
| <i>F</i> (000)                                                 | 782                                                                                            | 1564                                                                                           | 3519                                                                                           | 1900                                                                                                                                            |
| T <sub>min</sub> , T <sub>max</sub>                            | 0.7778, 0.9414                                                                                 | 0.970, 0.987                                                                                   | 0.962, 0.982                                                                                   | 0.783, 0.892                                                                                                                                    |
| $\theta$ -range for data collection (°)                        | 2.984 $\leq \theta \leq$ 25.349                                                                | 3.033 $\leq \theta \leq$ 25.308                                                                | 3.272 $\leq \theta \leq$ 68.152                                                                | 3.424 $\leq \theta \leq$ 68.186                                                                                                                 |
| Index ranges                                                   | -9 $\leq h \leq$ 9; -16 $\leq k \leq$ 16; -18 $\leq l \leq$ 18                                 | -16 $\leq h \leq$ 16; -18 $\leq k \leq$ 18; -21 $\leq l \leq$ 21                               | -26 $\leq h \leq$ 26; -26 $\leq k \leq$ 27; -21 $\leq l \leq$ 20                               | -32 $\leq h \leq$ 32; -11 $\leq k \leq$ 11; -18 $\leq l \leq$ 18                                                                                |
| Reflections collected                                          | 20566                                                                                          | 51524                                                                                          | 18855                                                                                          | 24441                                                                                                                                           |
| Completeness to 2 $\theta$                                     | 0.998                                                                                          | 0.997                                                                                          | 0.998                                                                                          | 0.999                                                                                                                                           |
| Independent reflections                                        | 5798                                                                                           | 12256                                                                                          | 3429                                                                                           | 3661                                                                                                                                            |
| R <sub>int</sub>                                               | 0.1852                                                                                         | 0.1301                                                                                         | 0.1176                                                                                         | 0.0901                                                                                                                                          |
| Reflections <i>I</i> > 2 $\sigma$ ( <i>I</i> )                 | 3000                                                                                           | 7883                                                                                           | 1580                                                                                           | 2601                                                                                                                                            |
| Data / restraints / parameters                                 | 5798 / 0 / 410                                                                                 | 12256 / 0 / 822                                                                                | 3429 / 0 / 207                                                                                 | 3661 / 0 / 234                                                                                                                                  |
| Goodness-of-fit on <i>F</i> <sup>2</sup>                       | 1.111                                                                                          | 1.054                                                                                          | 1.094                                                                                          | 1.151                                                                                                                                           |
| Final <i>R</i> indices [ <i>I</i> > 2 $\sigma$ ( <i>I</i> )]   | <i>R</i> 1 = 0.1495, <i>wR</i> 2 = 0.3073                                                      | <i>R</i> 1 = 0.0777, <i>wR</i> 2 = 0.1198                                                      | <i>R</i> 1 = 0.1033, <i>wR</i> 2 = 0.1672                                                      | <i>R</i> 1 = 0.1231, <i>wR</i> 2 = 0.2351                                                                                                       |
| <i>R</i> indices (all data)                                    | <i>R</i> 1 = 0.2415, <i>wR</i> 2 = 0.3583                                                      | <i>R</i> 1 = 0.1375, <i>wR</i> 2 = 0.1366                                                      | <i>R</i> 1 = 0.2142, <i>wR</i> 2 = 0.2052                                                      | <i>R</i> 1 = 0.1623, <i>wR</i> 2 = 0.2539                                                                                                       |
| Max. and mean shift/esd                                        | 0.000; 0.000                                                                                   | 0.001; 0.000                                                                                   | 0.000; 0.000                                                                                   | 0.000; 0.000                                                                                                                                    |
| $\Delta\rho_{\max}$ , $\Delta\rho_{\min}$ (e Å <sup>-3</sup> ) | 1.205, -0.647                                                                                  | 0.564, -0.576                                                                                  | 0.553, -0.264                                                                                  | 0.887, -0.619                                                                                                                                   |



**Table S10.** Comparison of molecular conformations: root-mean-square deviation (rmsD) values (Å) of [CuL<sub>2</sub>] complexes (high similarity values are marked with gray).

| Cryst. Nr. | 3 | 4      | 5      | 6      | 7      | 8A     | 8B     | 8C     | 9      | 10     |
|------------|---|--------|--------|--------|--------|--------|--------|--------|--------|--------|
| 3          |   | 0.0889 | 0.1599 | 0.1538 | 0.6089 | 0.8649 | 0.8212 | 0.8418 | 0.8257 | 0.9978 |
| 4          |   |        | 0.1183 | 0.0826 | 0.6199 | 0.8647 | 0.8124 | 0.8453 | 0.8139 | 0.9879 |
| 5          |   |        |        | 0.1008 | 0.6481 | 0.8659 | 0.7930 | 0.8372 | 0.7937 | 0.9712 |
| 6          |   |        |        |        | 0.6393 | 0.8728 | 0.8107 | 0.8522 | 0.8081 | 0.9819 |
| 7          |   |        |        |        |        | 1.0187 | 1.0246 | 1.0284 | 1.0312 | 0.9168 |
| 8A         |   |        |        |        |        |        | 0.2434 | 0.1878 | 0.2516 | 0.5737 |
| 8B         |   |        |        |        |        |        |        | 0.1635 | 0.0777 | 0.6500 |
| 8C         |   |        |        |        |        |        |        |        | 0.1878 | 0.5142 |
| 9          |   |        |        |        |        |        |        |        |        | 0.6771 |

**Table S11.** Comparison of molecular conformations: maximum atomic distance (maxD) values (Å) of [CuL<sub>2</sub>] complexes (high similarity values are marked with gray).

| Cryst. Nr. | 3 | 4      | 5      | 6      | 7      | 8A     | 8B     | 8C     | 9      | 10     |
|------------|---|--------|--------|--------|--------|--------|--------|--------|--------|--------|
| 3          |   | 0.1765 | 0.2569 | 0.2419 | 3.0863 | 2.1343 | 2.1284 | 2.0599 | 2.1563 | 2.7058 |
| 4          |   |        | 0.2427 | 0.1489 | 3.1388 | 2.0892 | 2.0693 | 2.0054 | 2.0969 | 2.7780 |
| 5          |   |        |        | 0.2380 | 3.2499 | 2.0264 | 1.9893 | 1.9314 | 2.0164 | 2.8848 |
| 6          |   |        |        |        | 3.2371 | 2.0564 | 2.0149 | 1.9579 | 2.0421 | 2.8888 |
| 7          |   |        |        |        |        | 2.4873 | 2.7187 | 2.6089 | 2.8167 | 2.8209 |
| 8A         |   |        |        |        |        |        | 0.5322 | 0.3915 | 0.5907 | 1.3423 |
| 8B         |   |        |        |        |        |        |        | 0.3301 | 0.1941 | 1.4561 |
| 8C         |   |        |        |        |        |        |        |        | 0.3210 | 1.1943 |
| 9          |   |        |        |        |        |        |        |        |        | 1.4488 |

**Table S12.** Selected hydrogen bond distances (Å) and angles (°) in crystals **7-10**

| <i>D—H...A</i>                 | <i>D—H</i> | <i>H...A</i> | <i>D...A</i> | <i>D—H...A</i> | Symmetry codes                                           |
|--------------------------------|------------|--------------|--------------|----------------|----------------------------------------------------------|
| <b>7</b>                       |            |              |              |                |                                                          |
| <i>N1—H1A...O2</i>             | 0.79       | 2.18         | 2.934(15)    | 161            | − <i>x</i> , − <i>y</i> , 1− <i>z</i>                    |
| <i>N1—H1B...N8</i>             | 0.89       | 2.51         | 3.350(16)    | 157            | −1+ <i>x</i> , <i>y</i> , <i>z</i>                       |
| <i>N2—H2B...O4</i>             | 0.71       | 2.29         | 2.916(15)    | 147            | − <i>x</i> , − <i>y</i> , − <i>z</i>                     |
| <b>8</b>                       |            |              |              |                |                                                          |
| <i>C13—H13B...O6</i>           | 0.99       | 2.43         | 3.184(8)     | 133            |                                                          |
| <i>C11—H11B...O6</i>           | 0.99       | 2.37         | 3.128(8)     | 133            |                                                          |
| <i>C33—H33B...O3</i>           | 0.99       | 2.34         | 3.082(8)     | 131            |                                                          |
| <i>C31—H11A...O3</i>           | 0.99       | 2.44         | 3.168(8)     | 130            |                                                          |
| <i>C13'—H13C'...O3'</i>        | 0.99       | 2.34         | 3.117(8)     | 135            | 1− <i>x</i> , 1− <i>y</i> , − <i>z</i>                   |
| <i>C11'—H11D...O3'</i>         | 0.99       | 2.46         | 3.196(8)     | 131            | 1− <i>x</i> , 1− <i>y</i> , − <i>z</i>                   |
| <i>C33'—H33D...O6'</i>         | 0.99       | 2.42         | 3.195(9)     | 135            | 1− <i>x</i> , 1− <i>y</i> , − <i>z</i>                   |
| <i>C31'—H31C'...O6'</i>        | 0.99       | 2.55         | 3.284(9)     | 131            | 1− <i>x</i> , 1− <i>y</i> , − <i>z</i>                   |
| <i>N1—H1A...O5</i>             | 0.93       | 2.13         | 2.990(6)     | 154            | <i>x</i> , 1+ <i>y</i> , 1+ <i>z</i>                     |
| <i>N1—H1B...N28'</i>           | 0.79       | 2.43         | 3.195(7)     | 163            | 1− <i>x</i> , 1− <i>y</i> , 1− <i>z</i>                  |
| <i>N2—H2A...O4</i>             | 0.86       | 2.18         | 3.032(7)     | 173            | 2− <i>x</i> , −1− <i>y</i> , − <i>z</i>                  |
| <i>N2—H2B...O2</i>             | 0.88       | 2.11         | 2.971(6)     | 165            | <i>x</i> , −1+ <i>y</i> , −1+ <i>z</i>                   |
| <i>N1'—H1'A...O2'</i>          | 0.79       | 2.16         | 2.901(6)     | 156            | 1− <i>x</i> , 2− <i>y</i> , 1− <i>z</i>                  |
| <i>N1'—H1'B...N8</i>           | 0.84       | 2.06         | 2.895(7)     | 169            | <i>x</i> , 1+ <i>y</i> , <i>z</i>                        |
| <i>N2'—H2'A...N8'</i>          | 0.87       | 2.19         | 3.012(7)     | 165            | 1− <i>x</i> , 1− <i>y</i> , − <i>z</i>                   |
| <i>N2'—H2'B...O5'</i>          | 0.81       | 2.18         | 2.929(6)     | 155            | 1− <i>x</i> , − <i>y</i> , 1− <i>z</i>                   |
| <b>9</b>                       |            |              |              |                |                                                          |
| <i>C13—H13A...O3</i>           | 0.99       | 2.40         | 3.140(14)    | 131            | 2/3− <i>x</i> , 1/3− <i>y</i> , −2/3− <i>z</i>           |
| <i>C11—H11B...O3</i>           | 0.99       | 2.31         | 3.085(12)    | 135            | 2/3− <i>x</i> , 1/3− <i>y</i> , −2/3− <i>z</i>           |
| <i>N1—H1A...O2</i>             | 0.94       | 1.95         | 2.882(7)     | 172            | 2/3− <i>x</i> , 1/3− <i>y</i> , 1/3− <i>z</i>            |
| <i>N1—H1B...N8<sup>l</sup></i> | 0.92       | 2.03         | 2.926(12)    | 163            | 2/3− <i>x</i> + <i>y</i> , 1/3− <i>x</i> , 1/3+ <i>z</i> |
| <b>10</b>                      |            |              |              |                |                                                          |
| <i>C13—H13A...O3</i>           | 0.99       | 2.59         | 3.340(19)    | 132            | 1/2− <i>x</i> , 1/2− <i>y</i> , − <i>z</i>               |
| <i>C11—H11B...O3</i>           | 0.99       | 2.57         | 3.306(17)    | 131            | 1/2− <i>x</i> , 1/2− <i>y</i> , − <i>z</i>               |
| <i>N1—H1A...O2</i>             | 0.88       | 2.39         | 2.995(12)    | 126            | <i>x</i> , − <i>y</i> , 1/2+ <i>z</i>                    |
| <i>N1—H1B...N8</i>             | 0.88       | 2.22         | 2.945(10)    | 139            | 1− <i>x</i> , − <i>y</i> , 1− <i>z</i>                   |

**Table S13.** Frequencies of major IR bands of compounds **1** and **2** with tentative assignments

| (1) HL                     | (2) HL×0.5H <sub>2</sub> O    | Tentative assignment [29–31]                                      |
|----------------------------|-------------------------------|-------------------------------------------------------------------|
|                            | <b>3629</b>                   | v-OH                                                              |
| <b>3299</b>                | <b>3312</b>                   | v <sub>sym</sub> (NH <sub>2</sub> ) sulfonamide + v-NH piperidine |
| 3147                       | 3085<br>3064                  | v-CH arom                                                         |
| 2971<br>2931<br>2861       | 2973<br>2932<br>2861          | v-CH piperidine                                                   |
| <b>1666 s</b>              | <b>1661 s</b>                 | vC=O amide                                                        |
| <b>1596 m</b>              | <b>1593 m</b>                 | vC=C ring                                                         |
| <b>1561 m</b>              | <b>1556 m</b>                 | δNH amide                                                         |
| 1525                       | 1532                          |                                                                   |
| 1459                       | 1457                          |                                                                   |
| 1382                       | 1381                          |                                                                   |
| <b>1337 s</b>              | <b>1342 s</b>                 | v <sub>asym</sub> SO <sub>2</sub>                                 |
| 1323<br>1291               | 1328<br>1293                  | vC-C                                                              |
| 1263                       | 1265                          | vC-N                                                              |
| 1230                       | 1228                          |                                                                   |
| <b>1177</b><br><b>1166</b> | <b>1177 sh</b><br><b>1165</b> | v <sub>asym</sub> SO <sub>2</sub>                                 |
| 1134                       | 1134                          | vS-N                                                              |
| 1102                       | 1106                          |                                                                   |
| 1091                       | 1090                          |                                                                   |
| 1057                       | 1056                          |                                                                   |
| <b>1042</b>                | <b>1040</b>                   | vCC+δCH ring                                                      |
| 979<br>929<br>911          | 981<br>928<br>914             | vC-C + vC-N                                                       |
| <b>849</b>                 | <b>853</b>                    | vS-N                                                              |
| 839                        |                               |                                                                   |
| 809                        | 811                           |                                                                   |
| <b>764 s</b>               | <b>762 s</b>                  | vC-N                                                              |
| 709                        | 708                           |                                                                   |
| 682                        | 683                           |                                                                   |
| 663                        |                               |                                                                   |
| 620                        | 612                           |                                                                   |
| <b>593 s</b>               | <b>591 s</b>                  | vCC+δCH ring                                                      |
| 552                        | 554                           |                                                                   |

Abbreviations: v-stretching vibration; δ-bending vibration; sym-symmetric; asym-antisymmetric; s-strong; m-medium; sh-shoulder

**Table 14:** Frequencies of major IR bands of compounds (**3-6**) with tentative assignments

| <b>(3)</b>                          | <b>(4)</b>                                          | <b>(5)</b>                                          | <b>(6)</b>                          | <b>Tentative assignment [29–31]</b>                                 |
|-------------------------------------|-----------------------------------------------------|-----------------------------------------------------|-------------------------------------|---------------------------------------------------------------------|
| 3475 sh                             | 3475 sh                                             | 3475 sh                                             | 3475 sh                             | v-OH                                                                |
| 3240                                | 3339                                                | 3339                                                | 3240                                | $\nu_{\text{sym}}$ (NH <sub>2</sub> ) sulfonamide + v-NH piperidine |
| 3068                                | 3091<br>3068                                        | 3091<br>3068                                        | 3071                                | v-CH arom                                                           |
| 2969<br>2932<br>2858                | 2962<br>2928<br>2859                                | 2962<br>2928<br>2858                                | 2969<br>2932<br>2859                | v-CH piperidine                                                     |
| <b>1653 br, <math>\nabla</math></b> | <b>1649, 1634<br/>br, <math>\nabla\nabla</math></b> | <b>1656, 1634<br/>br, <math>\nabla\nabla</math></b> | <b>1652 br, <math>\nabla</math></b> | <b><math>\nu\text{C=O amide}</math></b>                             |
| 1589                                | 1587                                                | 1587                                                | 1590                                | $\delta$ -NH                                                        |
| 1544                                | 1546                                                | 1544                                                | 1546                                | $\delta$ -NH amide                                                  |
| <b>1373<br/>1353</b>                | <b>1373 sh,<br/>1355 <math>\nearrow</math></b>      | <b>1373 sh,<br/>1355 <math>\nearrow</math></b>      | <b>1373<br/>1353</b>                | <b><math>\nu_{\text{asym}}\text{SO}_2</math></b>                    |
| <b>1241<br/>1226</b>                | <b>1245</b>                                         | <b>1244</b>                                         | <b>1240<br/>1228</b>                | <b><math>\nu\text{C-O}+\delta\text{O-H alcohol}</math></b>          |
| <b>1156<br/>1129<br/>1103</b>       | <b>1156<br/>1127</b>                                | <b>1156<br/>1126</b>                                | <b>1156<br/>1128<br/>1104</b>       | <b><math>\nu_{\text{sym}}\text{SO}_2</math></b>                     |
| 1040                                | 1040                                                | 1040                                                | 1040                                | vC-C+ $\delta$ C-H ring                                             |
| <b>971<br/>950<br/>920</b>          | <b>966<br/>943</b>                                  | <b>966<br/>939</b>                                  | <b>973<br/>950<br/>922</b>          | <b><math>\nu\text{C-O}+\delta\text{O-H alcohol}</math></b>          |
| 836                                 | 834                                                 | 834                                                 | 834                                 |                                                                     |
| 744                                 | 744                                                 | 744                                                 | 744                                 | vC-N                                                                |
| 680                                 | 680                                                 | 680                                                 | 680                                 |                                                                     |
| 591                                 | 591                                                 | 591                                                 | 591                                 | vC-C+ $\delta$ C-H ring                                             |

Abbreviations: v-stretching vibration;  $\delta$ -bending vibration; sym-symmetric; asym-antisymmetric; br-broad; sh-shoulder

**Table 15:** Frequencies of major IR bands of compounds (7-10) with tentative assignments

| (7)                          | (8)                                             | (9)                        | (10)                                            | Tentative assignment [29–32]                                             |
|------------------------------|-------------------------------------------------|----------------------------|-------------------------------------------------|--------------------------------------------------------------------------|
| 3426 sh                      |                                                 |                            |                                                 | $\nu$ -OH                                                                |
| 3309 br<br>3247 br           | 3299                                            | 3303                       | 3299                                            | $\nu_{\text{sym}}$ (NH <sub>2</sub> ) sulfonamide + $\nu$ -NH piperidine |
| 3086                         | 3098<br>3068                                    | 3068                       | 3098<br>3068                                    | $\nu$ -CH arom                                                           |
|                              |                                                 |                            | 3060 <i>w</i><br>2979 <i>w</i>                  | CH <sub>2</sub> Cl <sub>2</sub>                                          |
| 2971<br>2946<br>2929<br>2860 | 2968<br>2926<br>2860                            | 2929<br>2869<br>2860       | 2968<br>2926<br>2860                            | $\nu$ -CH piperidine                                                     |
| <b>1662 m</b>                | <b>1661 w, br</b>                               | <b>1667 m</b>              | <b>1667 w, br</b>                               | <b><math>\nu</math>C=O amide</b>                                         |
| 1593 m<br>1574 m             | 1587 s                                          | 1595 m<br>1574 m           | 1590                                            | $\delta$ -NH                                                             |
| <b>1531</b>                  | <b>1550 m</b>                                   | <b>1536 m</b>              | <b>1550 m</b>                                   | <b><math>\delta</math>-NH amide</b>                                      |
| <b>1372</b><br><b>1340 s</b> | <b>1357 s</b><br><b>1335 s</b><br><b>1327 s</b> | <b>1363</b><br><b>1337</b> | <b>1357 s</b><br><b>1335 s</b><br><b>1327 s</b> | $\nu_{\text{asym}}$ SO <sub>2</sub>                                      |
| 1247                         | 1247                                            | 1247                       | 1247                                            |                                                                          |
|                              |                                                 |                            | 1266                                            | CH <sub>2</sub> Cl <sub>2</sub>                                          |
| 1169<br>1150                 | 1156<br>1150                                    | 1156<br>1150               | 1168<br>1150                                    | $\nu_{\text{sym}}$ SO <sub>2</sub>                                       |
| 1040                         | 1040                                            | 1040                       | 1040                                            | $\nu$ C-C+ $\delta$ C-H ring                                             |
| 922                          | 947<br>922                                      | 922                        | 947<br>922                                      | $\nu$ C-O+ $\delta$ O-H alcohol                                          |
| 847                          | 847                                             | 847                        | 847                                             |                                                                          |
| 744                          | 744                                             | 744                        | 744                                             | $\nu$ C-N                                                                |
|                              |                                                 |                            | 730                                             | CH <sub>2</sub> Cl <sub>2</sub>                                          |
| 591                          | 591                                             | 591                        | 591                                             | $\nu$ C-C+ $\delta$ C-H ring                                             |

Abbreviations:  $\nu$ -stretching vibration;  $\delta$ -bending vibration; sym-symmetric; asym-antisymmetric; s-strong; m-medium; br-broad; sh-shoulder; w-weak

29. Socrates G (2010) Infrared and Raman characteristic group frequencies: tables and charts, 3. ed., repr. as paperback. Wiley, Chichester
30. Topaçli C, Topaçli A (2002) INFRARED SPECTRA SIMULATION FOR SOME SULFONAMIDES BY USING SEMI-EMPIRICAL METHODS. Spectroscopy Letters 35:207–217 .  
<https://doi.org/10.1081/SL-120003806>
31. Bellamy LJ (2013) Infra-red Spectra of Complex Molecules. Springer Netherlands, Dordrecht
32. Breda S, Reva ID, Lapinski L, Nowak MJ, Fausto R (2006) Infrared spectra of pyrazine, pyrimidine and pyridazine in solid argon. Journal of Molecular Structure 786:193–206 .  
<https://doi.org/10.1016/j.molstruc.2005.09.010>

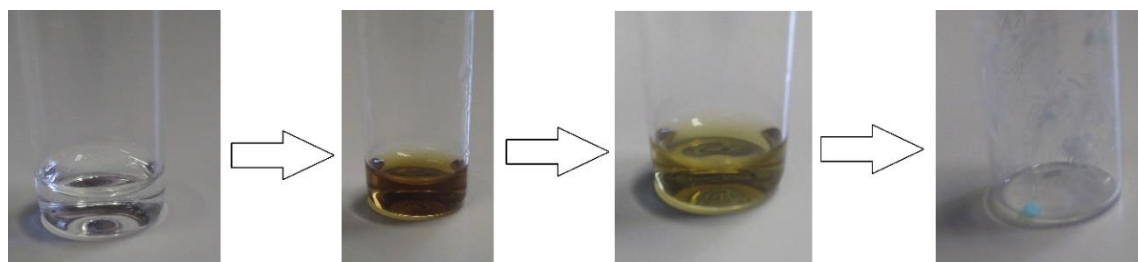

**Figure S1.** Crystallisation of Clopamide LH (**1**) from methanol solution. The colourless Clopamide solution becomes brown by adding  $\text{CuSO}_4$  indicating complex formation in solution. As the temperature decreases or the solvent evaporates from the system, the complex decomposes, which results in solvent free crystals of Clopamide LH (**1**) and blue  $\text{CuSO}_4 \cdot 5\text{H}_2\text{O}$  crystals.

(a)

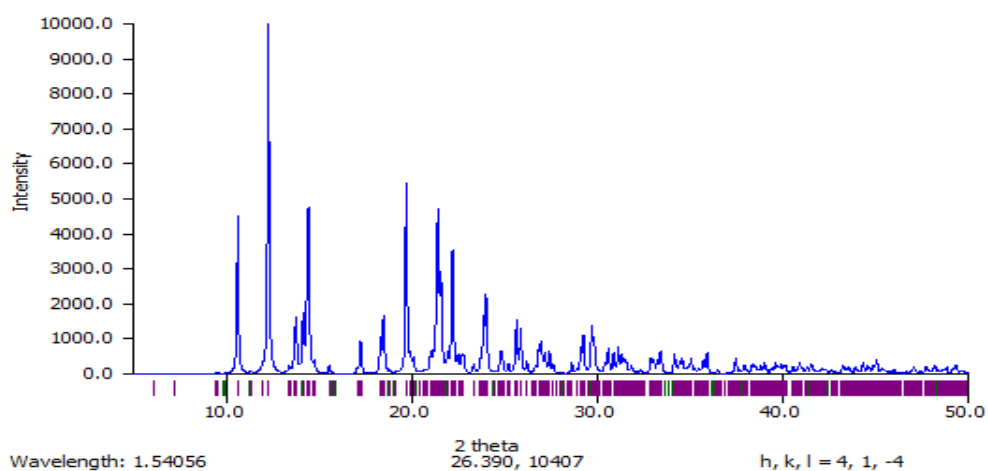

(b)

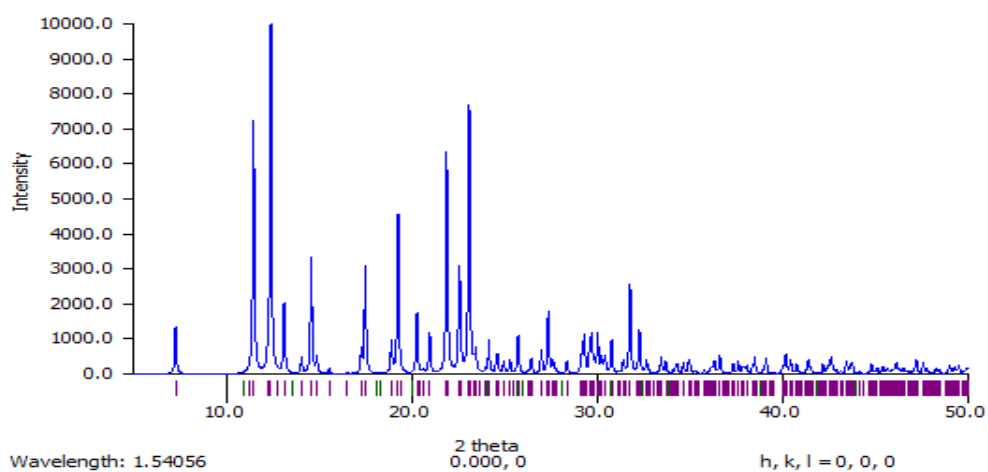

(c)

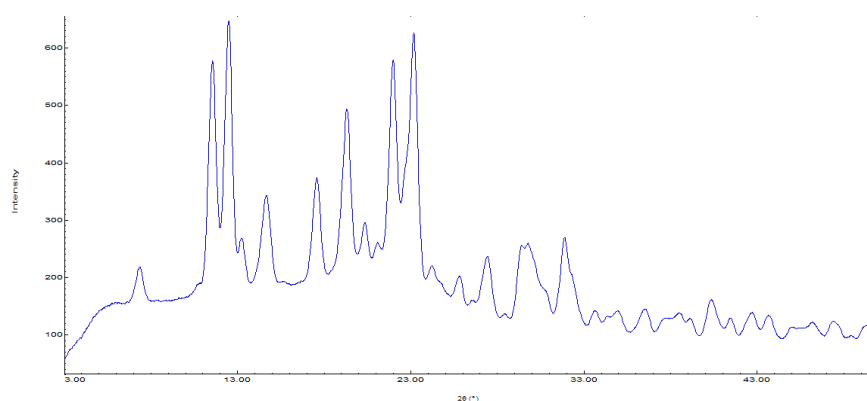

**Figure S2.** Calculated powder diffractograms of Clopamide: (a) anhydrate crystal **1** (b) hemihydrate crystal **2** and (c) measured PXRD of Clopamide API powder used as starting material in the crystallization experiments. The powder diffractogram of Clopamide sample used in the crystallization experiments agrees well with the calculated pattern based on the Clopamide hemihydrate structure **2**.

(a)

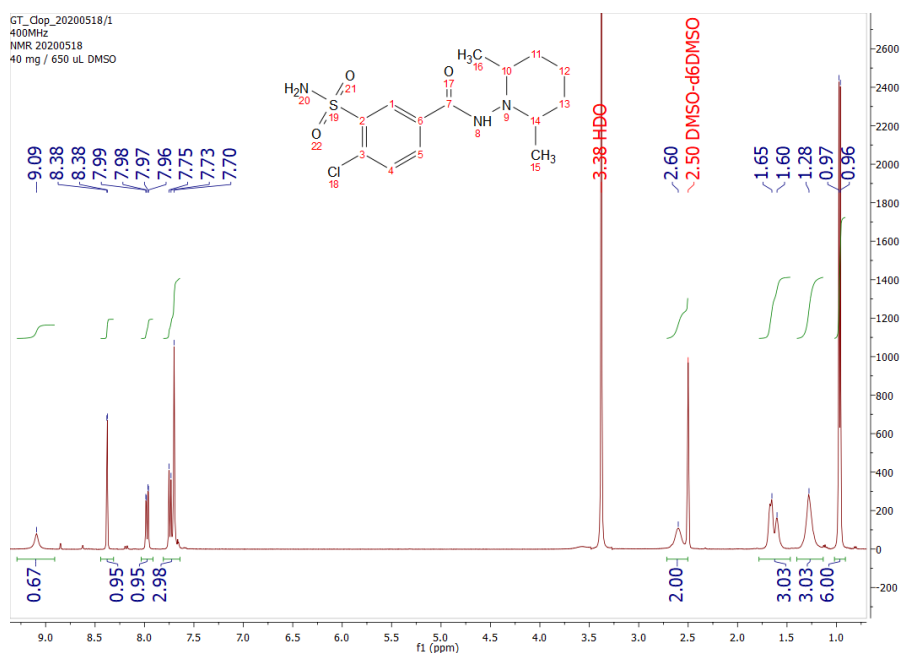

$^1\text{H-NMR}$  (400.13 MHz, DMSO, 25 °C)  $\delta$  0.97 (*d*,  $J=6.1$  Hz, 6H, C15/C16-CH<sub>3</sub>), 1.28, 1.60, 1.65 (*m*, 6H, C11/C12/C13-CH<sub>2</sub>), 2.60 (*m*, 2H, C10/C14-CH), 7.70 (*s*, 2H, SO<sub>2</sub>NH<sub>2</sub>), 7.74 (*d*,  $J=8.3$  Hz, 1H, C4-C<sub>ar</sub>H), 7.97 (*dd*,  $J=8.3, 2.2$  Hz, 1H, C5-C<sub>ar</sub>H), 8.38 (*d*,  $J=2.1$  Hz, 1H, C1-C<sub>ar</sub>H), 9.09 (*s*, 1H, N8-H), ppm.

(b)

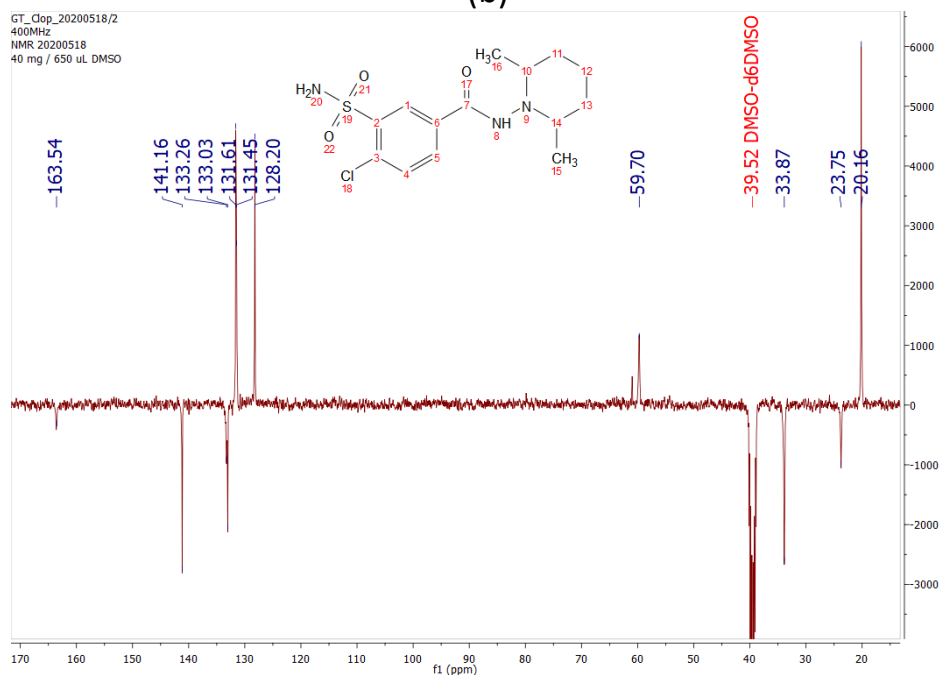

$^{13}\text{C NMR}$  (100.62 MHz, DMSO, 25 °C)  $\delta$ : 20.16 (C2, C15/16-CH<sub>3</sub>), 23.75 (C1, C12-CH<sub>2</sub>), 33.87 (C2, C11/13-CH<sub>2</sub>), 59.70 (C2, C10/14-CH), 128.20 (C1, C6-C<sub>ar</sub>H), 131.45 (C1, C5-C<sub>ar</sub>H), 131.61 (C1, C4-C<sub>ar</sub>H), 133.03 (C1, C3-C<sub>ar</sub>Cl), 133.26 (C1, C6-C<sub>q</sub>), 141.16 (C1, C6-C<sub>SO2NH2</sub>), 163.54 (C1, C7-C=O), ppm.

**Figure S3.** (a)  $^1\text{H-NMR}$  and (b)  $^{13}\text{C-NMR}$  spectrum of Clopamide powder used for the crystallization experiments.  $^1\text{H}$  and  $^{13}\text{C}$  NMR spectra were recorded with a Bruker Avance 400 (400 MHz spectrometer at 25 °C in deuterated dimethyl sulfoxide (DMSO).



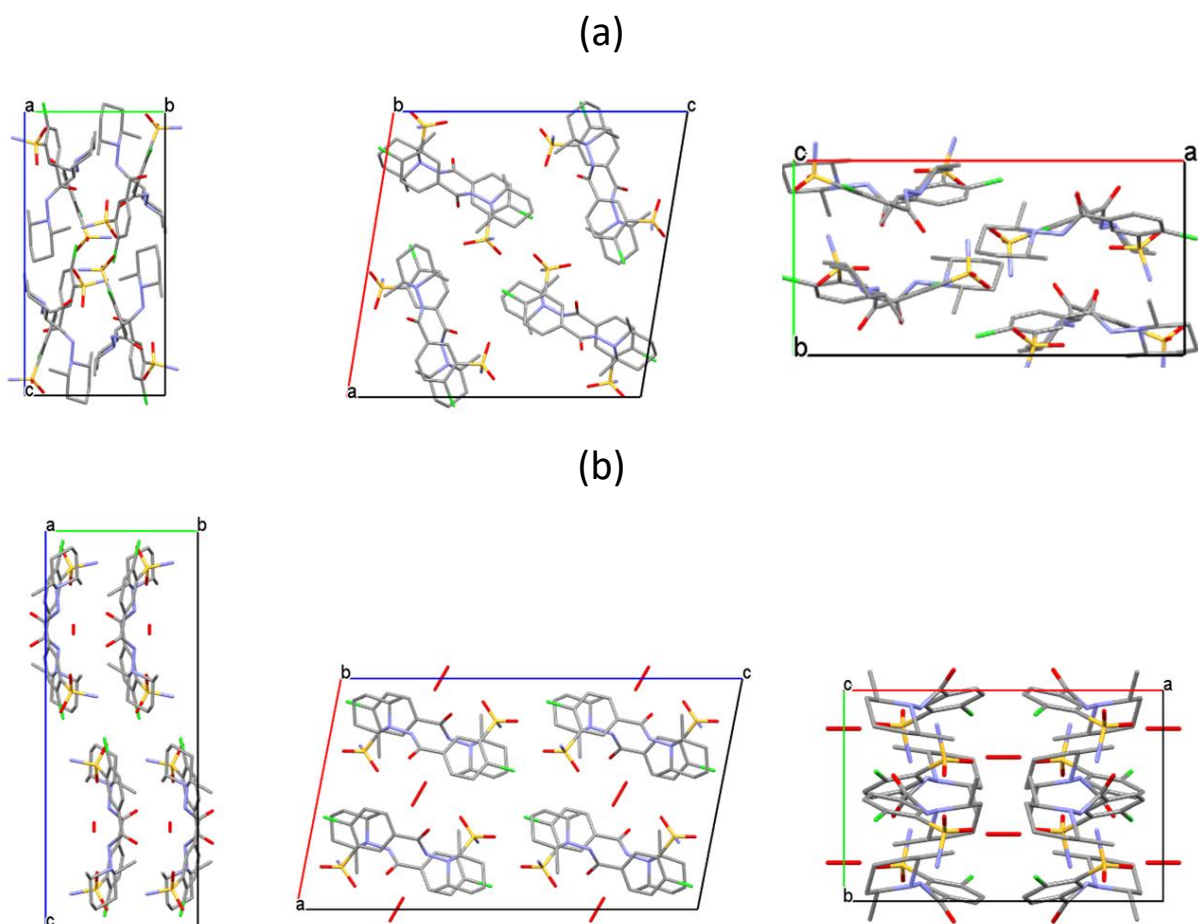

**Figure S4.** Comparison of the unit cells of crystals **1** (a) and **2** (b) viewed from crystallographic  $a$ ,  $b$  and  $c$  axes, respectively.

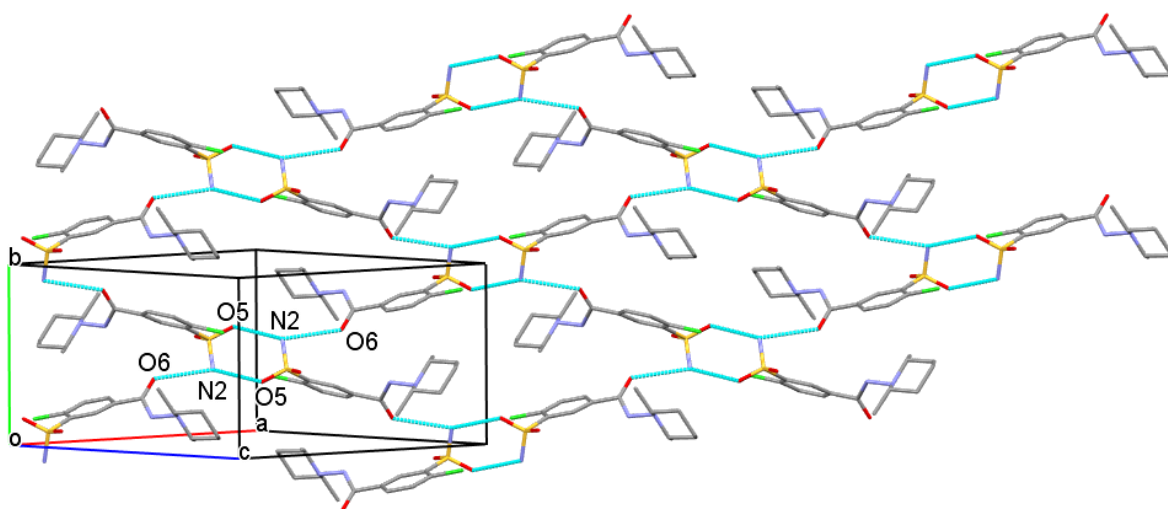

**Figure S5.** Layer of molecules B of **1** in *ac* diagonal with H-bonds.

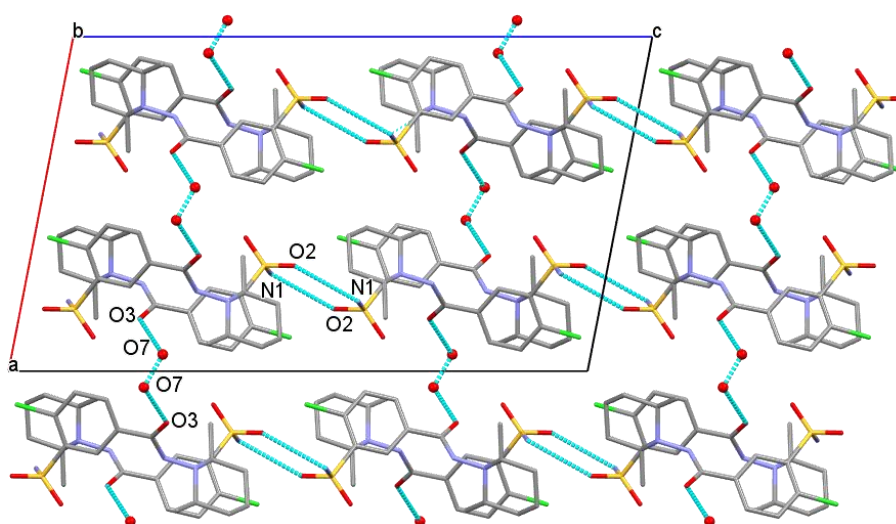

**Figure S6.** Layer of molecules **2** viewing from the crystallographic *b* axis. The disordered water molecules are drawn as red balls. The neighbouring water molecules are actually one water molecule in two disordered positions.



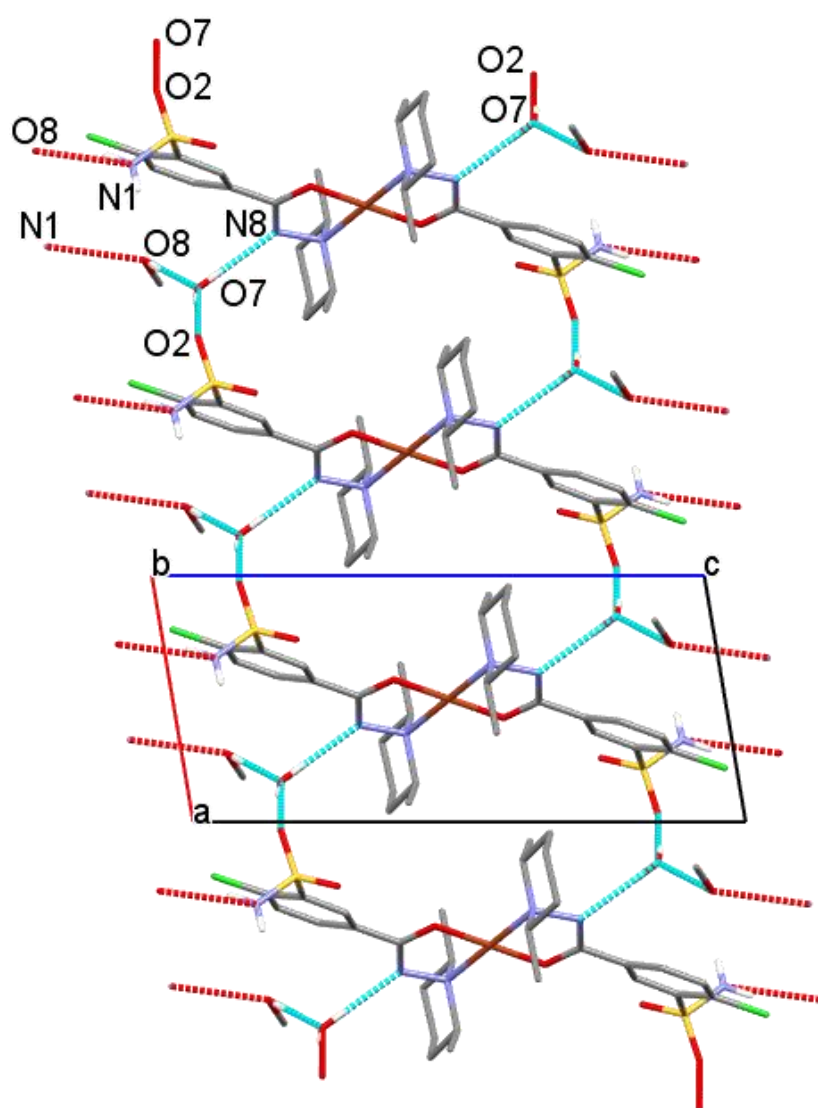

**Figure S8.** Viewed from the crystallographic direction 'a', molecular columns running along the 'b' axis are found in the solvatomorphic (3-6) series. The columns then form a sheet, the sheets form 3D network by secondary interactions. Here structure of crystal **3** is presented as typical example.

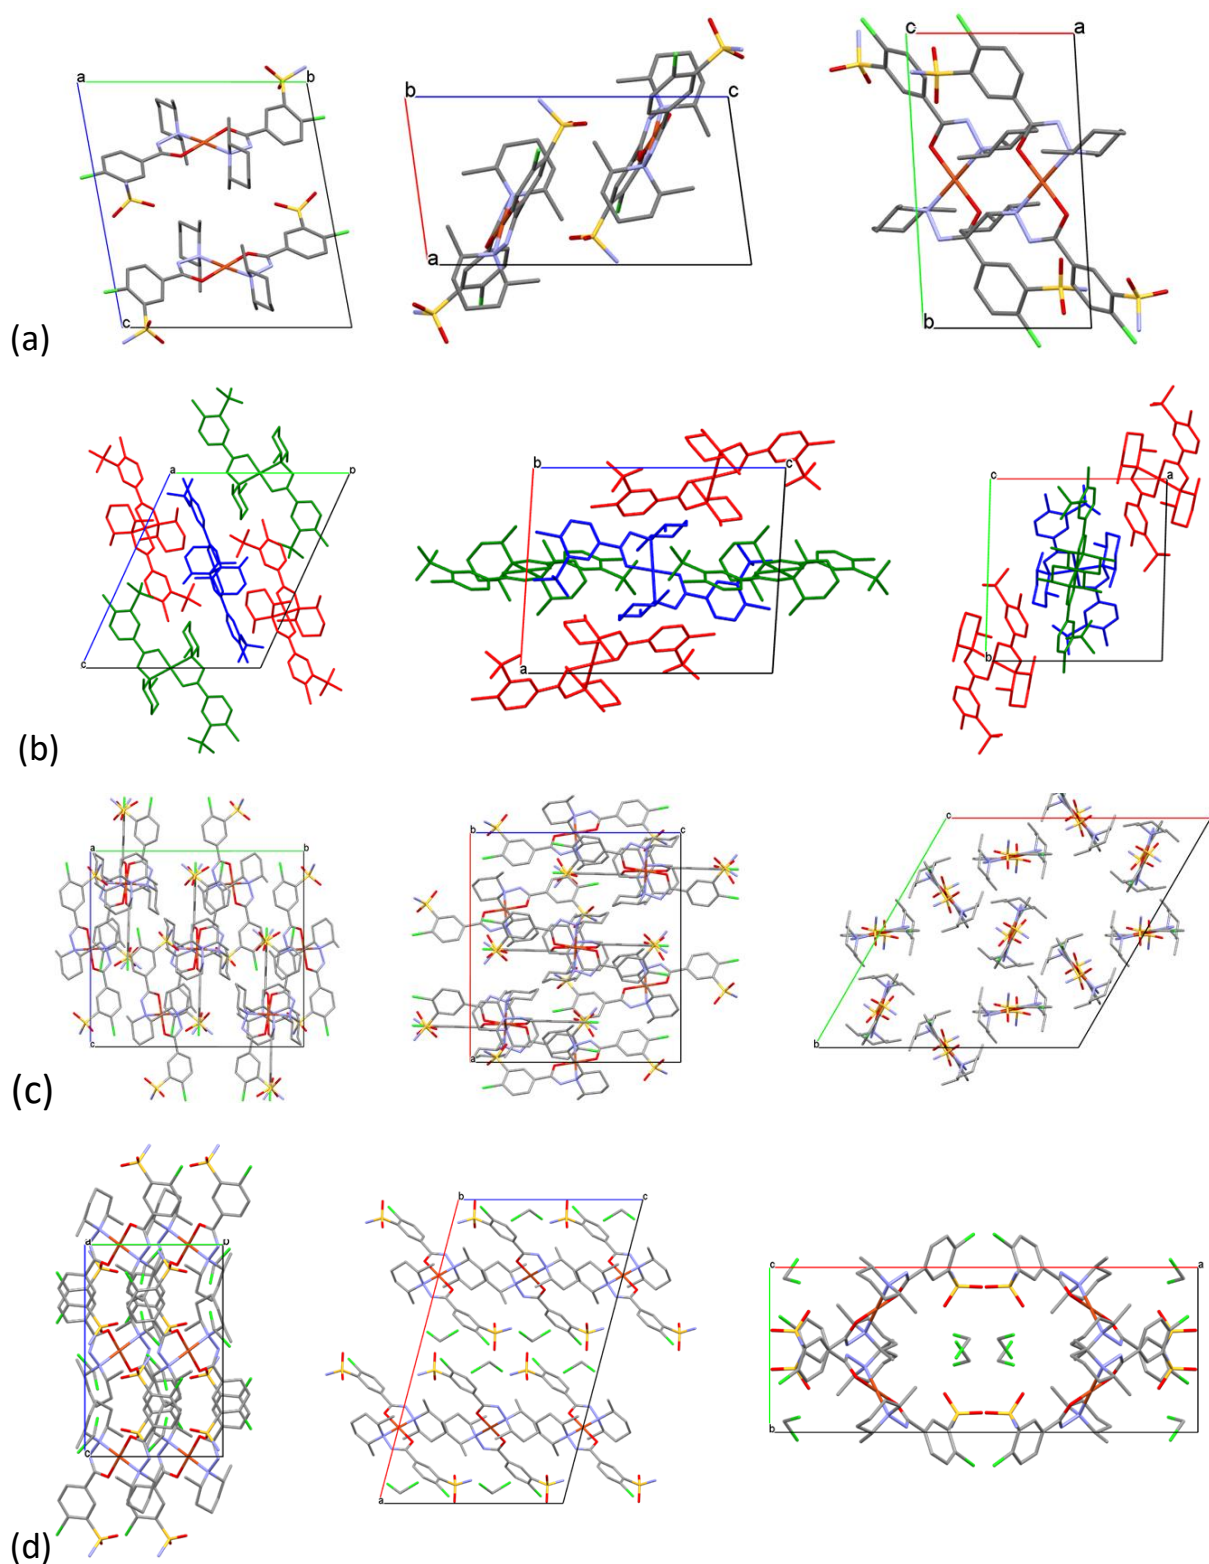

**Figure S9.** Unit cell of crystals **7** (a), **8**(b), **9** (c) and **10** (d) viewed from the crystallographic *a*, *b* and *c* axes. In case of crystal **8** the three molecules of the asymmetric unit are indicated by different colours: molecule A is red, molecule B is blue and molecule C is green

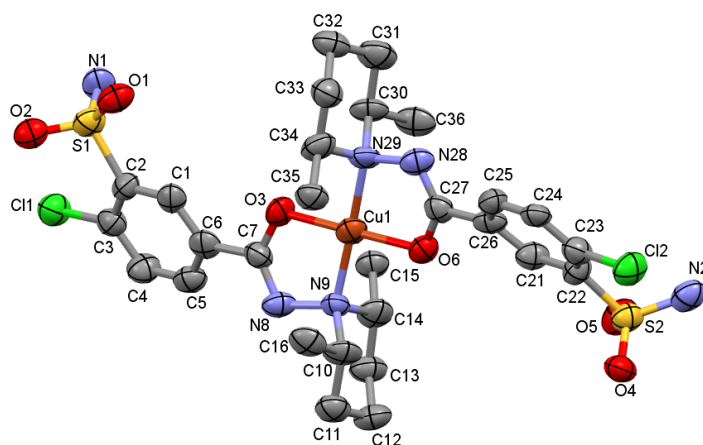

**Figure S10.** The molecular structure of **7** with atom labelling. Displacement ellipsoids are drawn at 50% probability level. The asymmetric unit contains a whole bis-complex molecule. H atoms have been omitted for clarity.

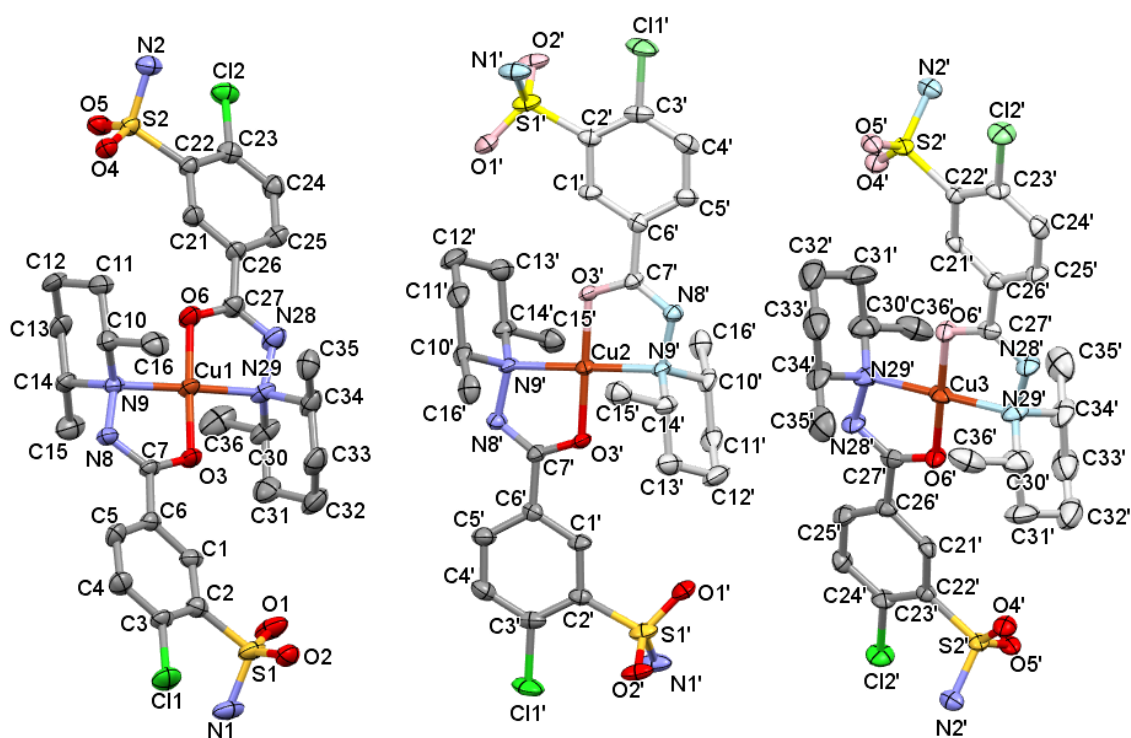

**Figure S11.** Molecular structure of **8** with atom labelling. Displacement ellipsoids are drawn at 50% probability level. The asymmetric unit consists of a whole bis-complex molecule and two halves of complex molecules. H atoms have been omitted for clarity.

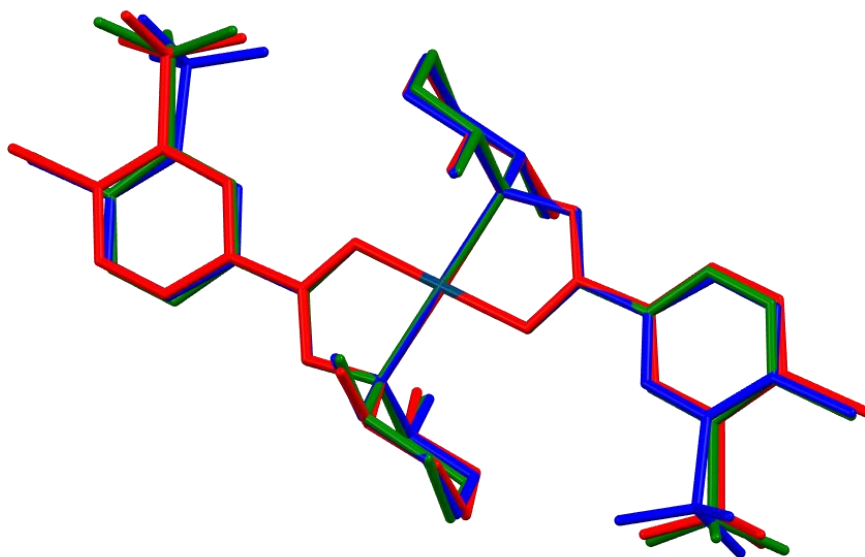

**Figure S12.** Structural overlay of the molecules of the asymmetric unit of crystal **8**. The superimposed atoms belong to the coordination sphere of the Cu(II) showing the conformational differences between the molecules: molecule A (red), molecule B (blue), and molecule C (green). The asymmetric unit contains the entire complex A (red) and the halves of the complexes B and C. Hydrogen atoms are removed for clarity.

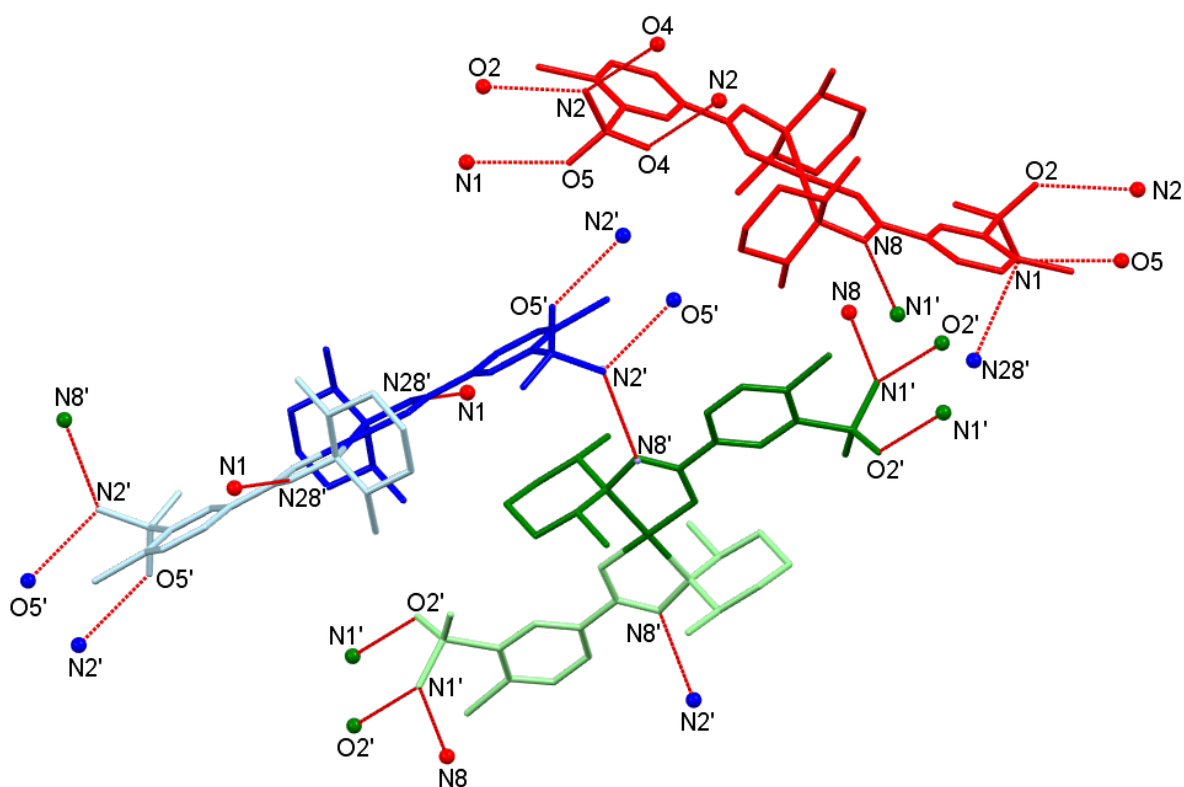

**Figure S13.** The asymmetric unit of crystal **8** showing the main H-bond interactions with neighbouring atoms. Molecule A is red, molecule B is blue and molecule C is green. The atoms at the ends of the hanging contacts are coloured according to the colour codes of the molecules.

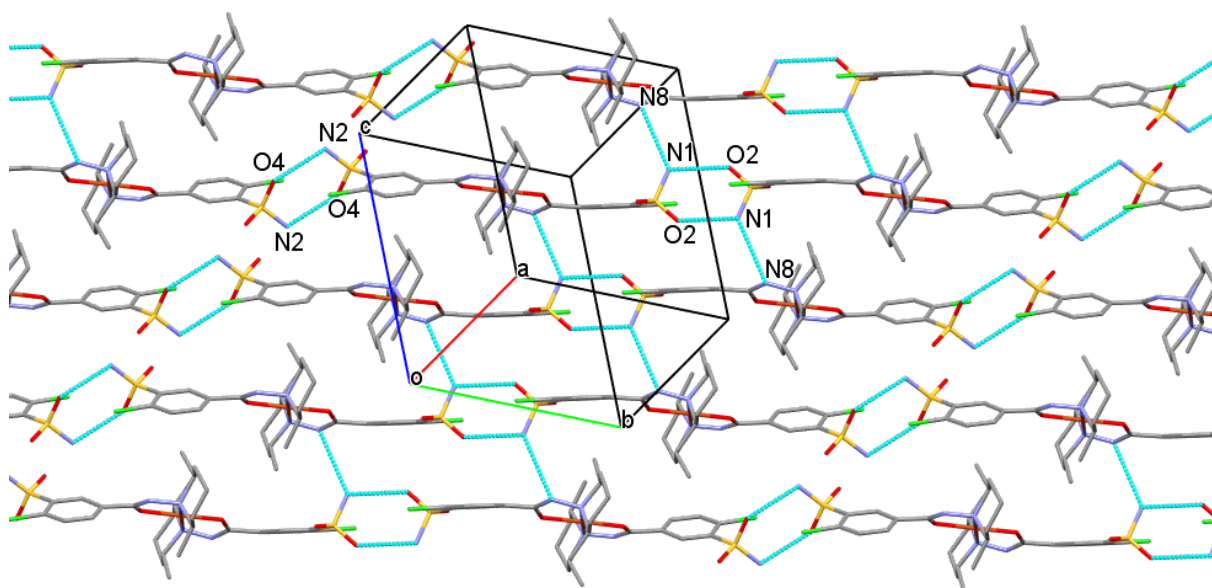

**Figure S14.** The molecules form planes in the crystal lattice, which are stabilized by strong N—H···O type interactions. N—H···N type H bonds also stabilize the crystal structure of **7**.

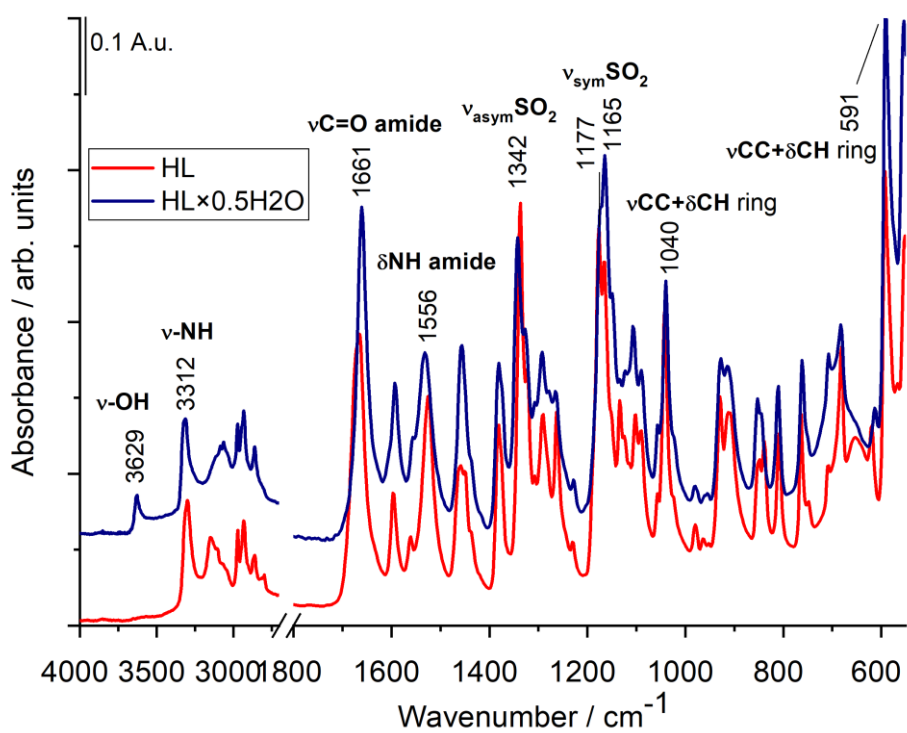

**Figure S15.** IR spectra of the anhydrate and hemihydrate forms (**1** and **2**) of clopamide.



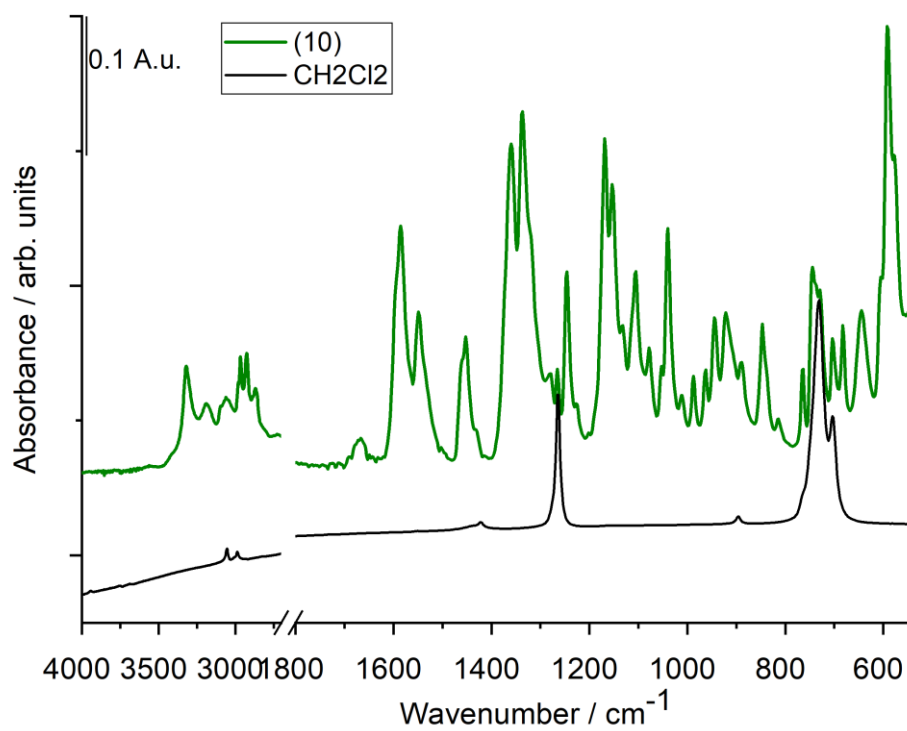

**Figure S16.** IR spectrum of compound **10** showing the presence of the DCM in the crystal.

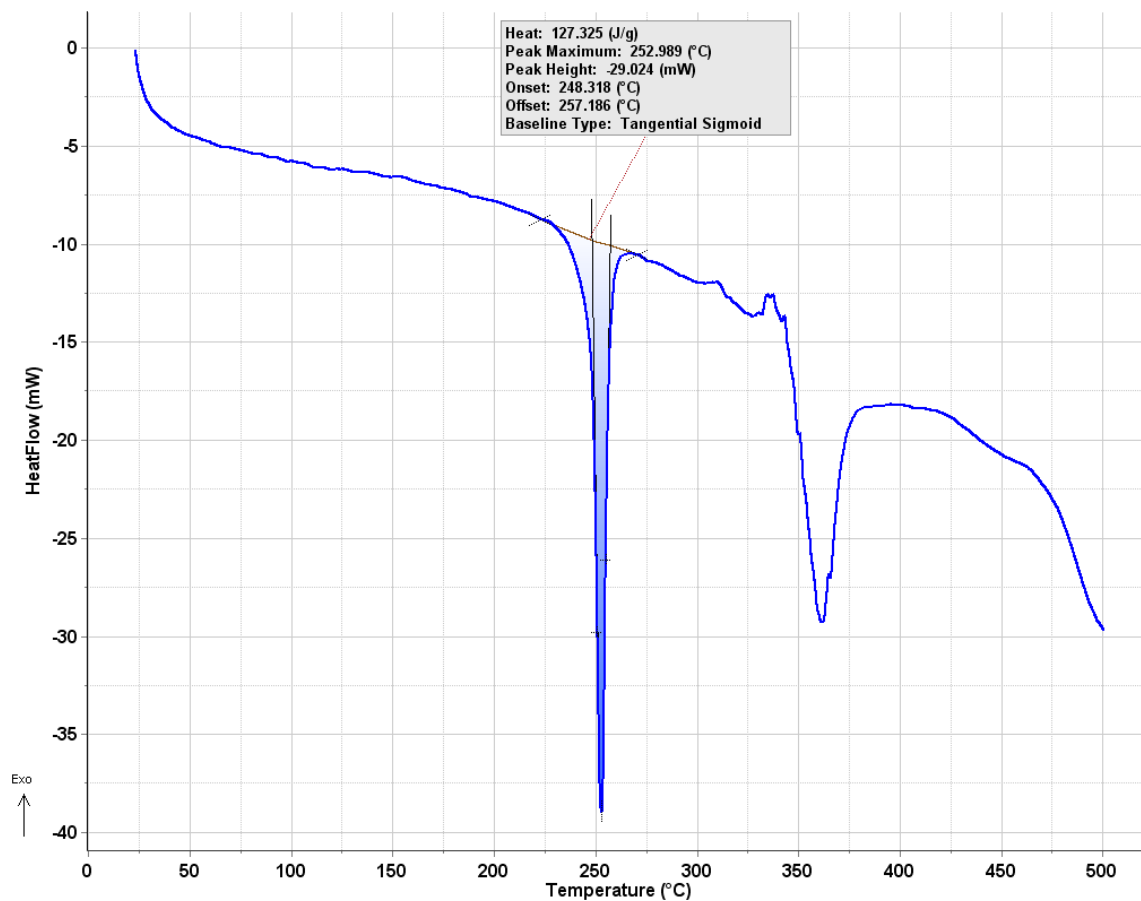

**Figure S17.** DSC curve of compound **1** in inert atmosphere.

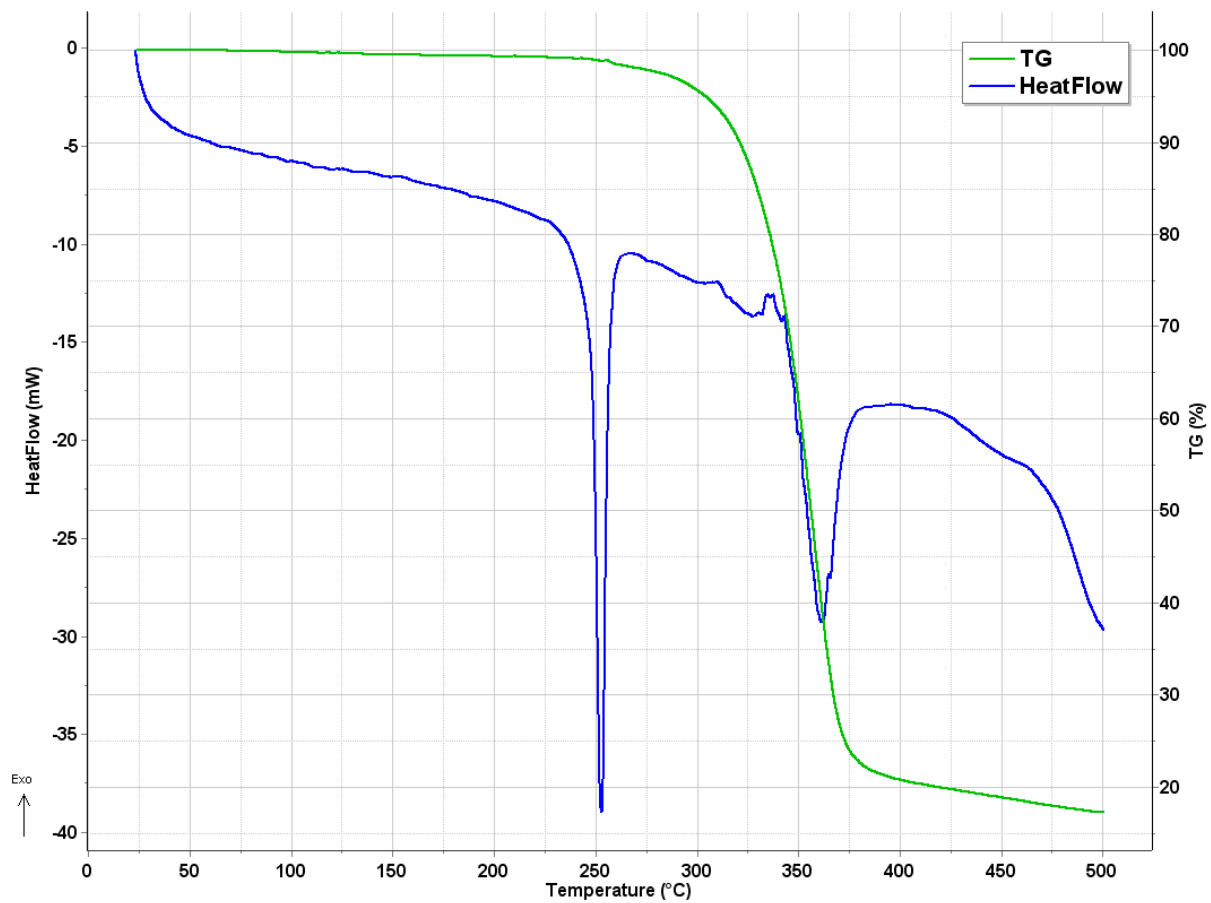

**Figure S18.** TG and DSC curves of compound **1** in inert atmosphere.

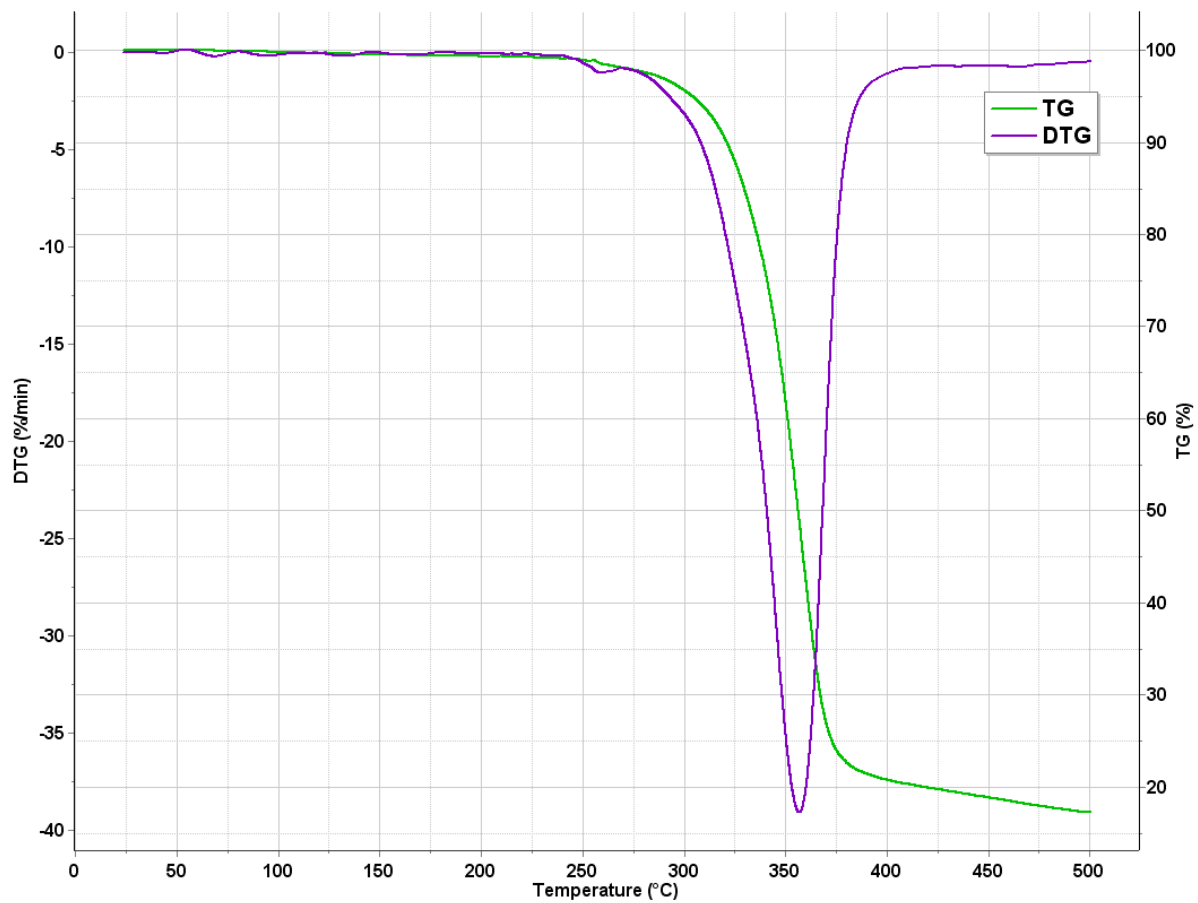

**Figure S19.** TG and DTG curves of compound **1** in synthetic air atmosphere.

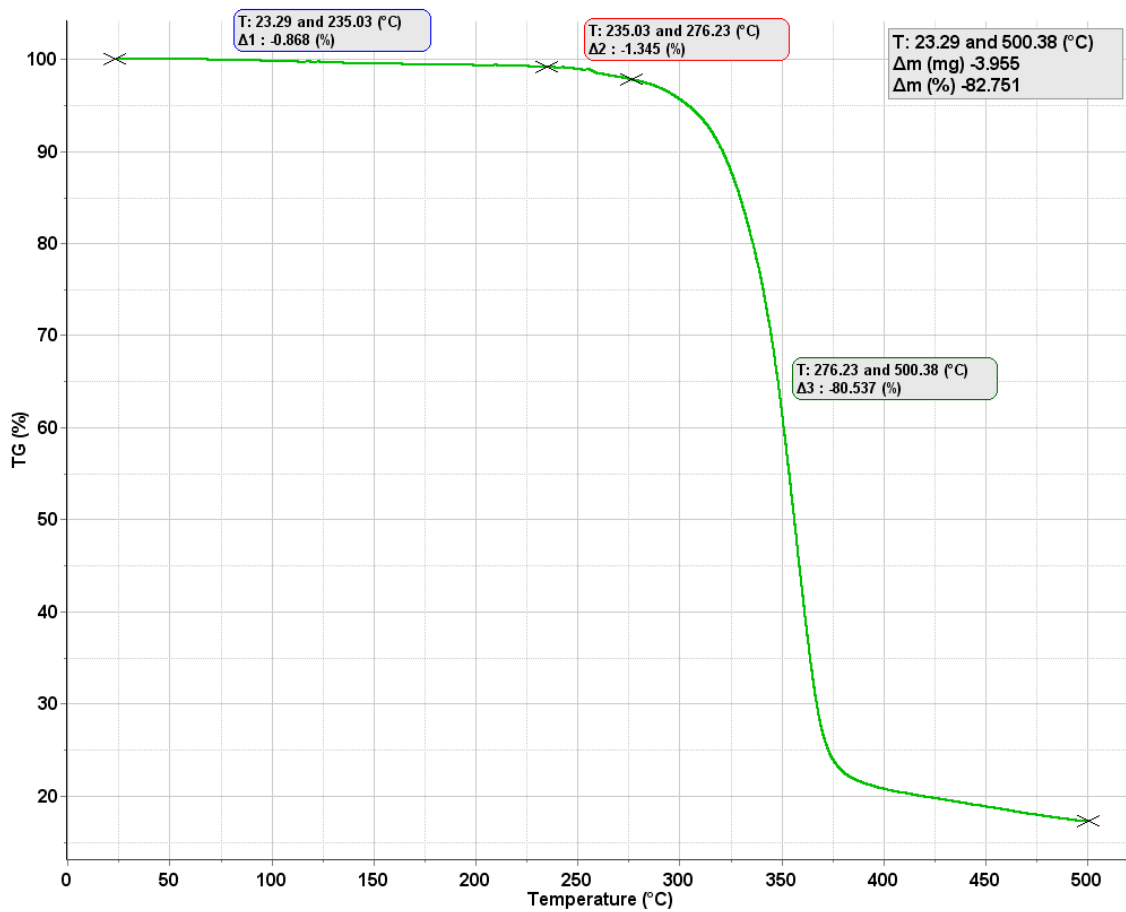

**Figure S20.** TG curves of compound **1** in He atmosphere.

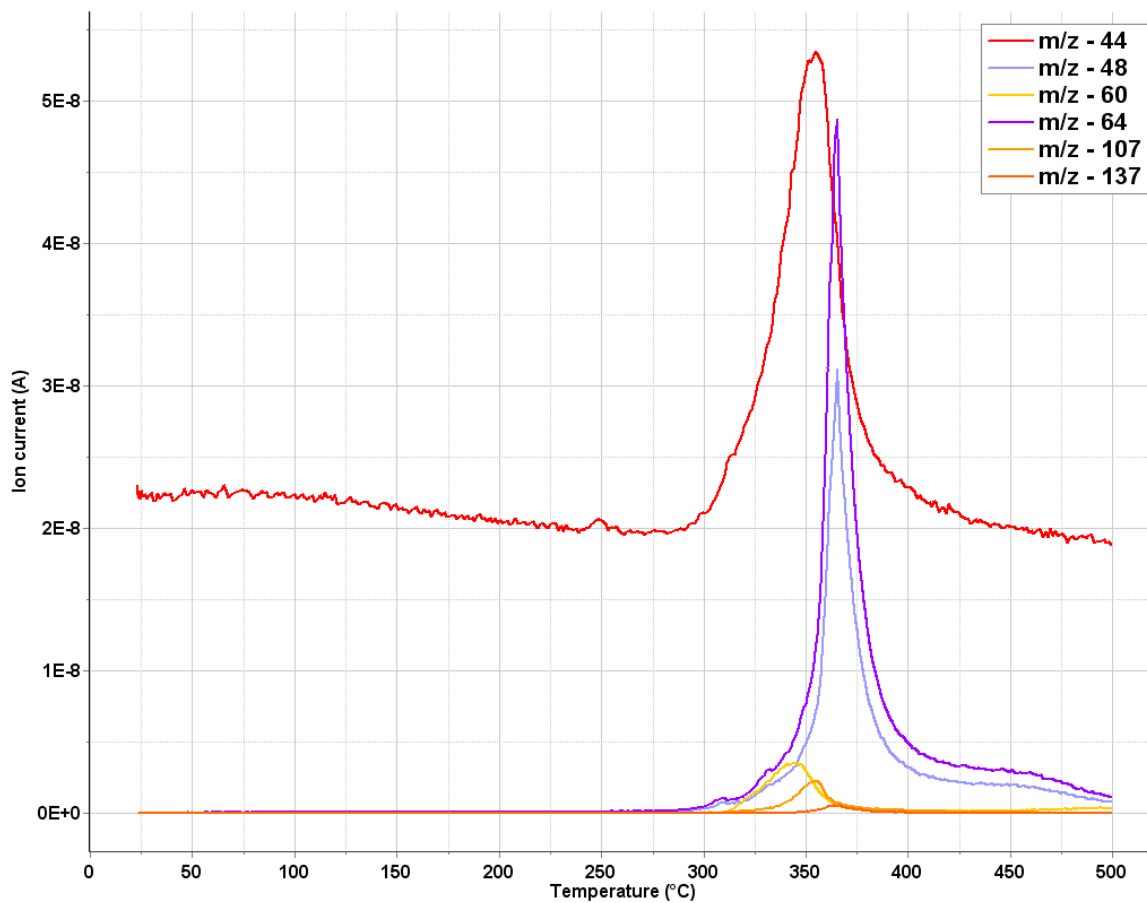

**Figure S21.** TG -MS curves of the fragments measured during thermal decomposition of compound **1** in inert atmosphere. The  $m/z=64$  shows the mass of  $\text{SO}_2$  as one of the products of degradation.

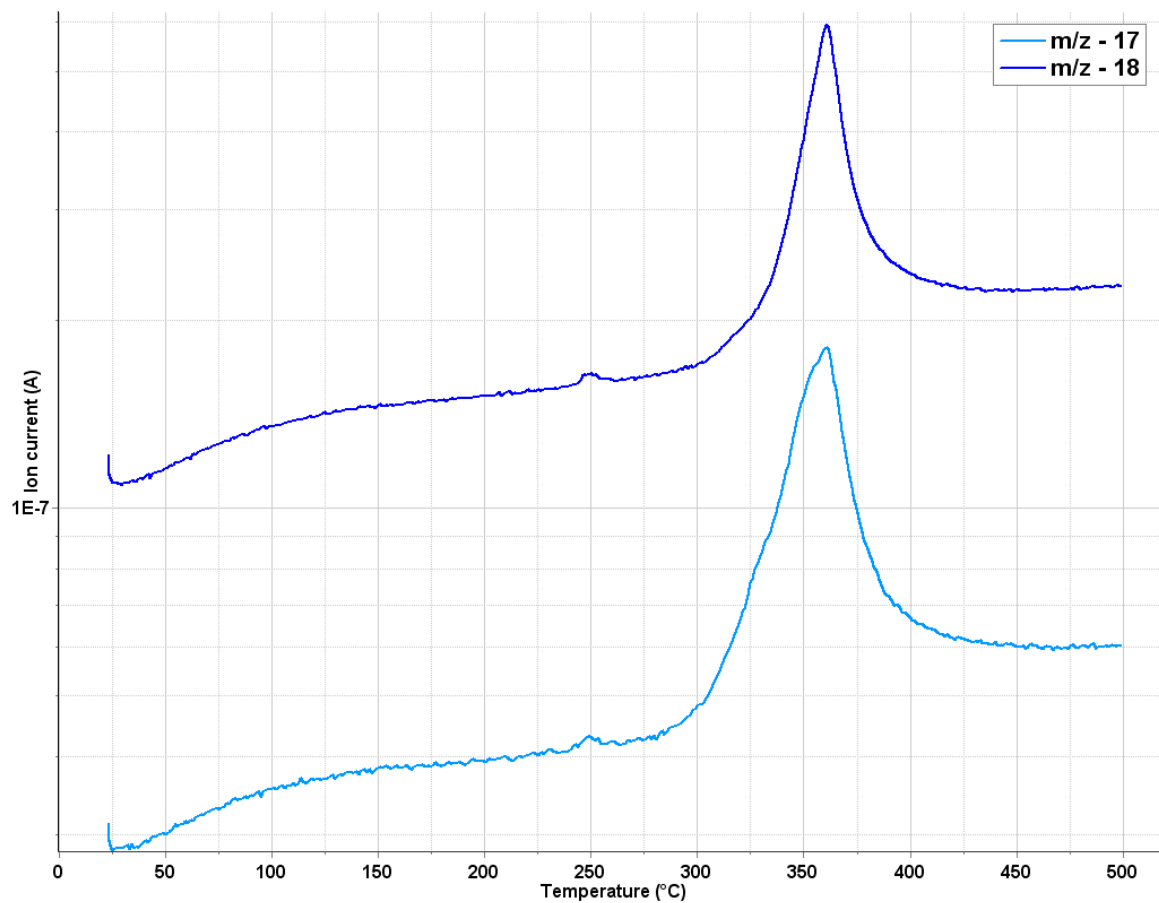

**Figure S22.** TG -MS curves of the water fragments measured during thermal decomposition of compound **1** under inert atmosphere.

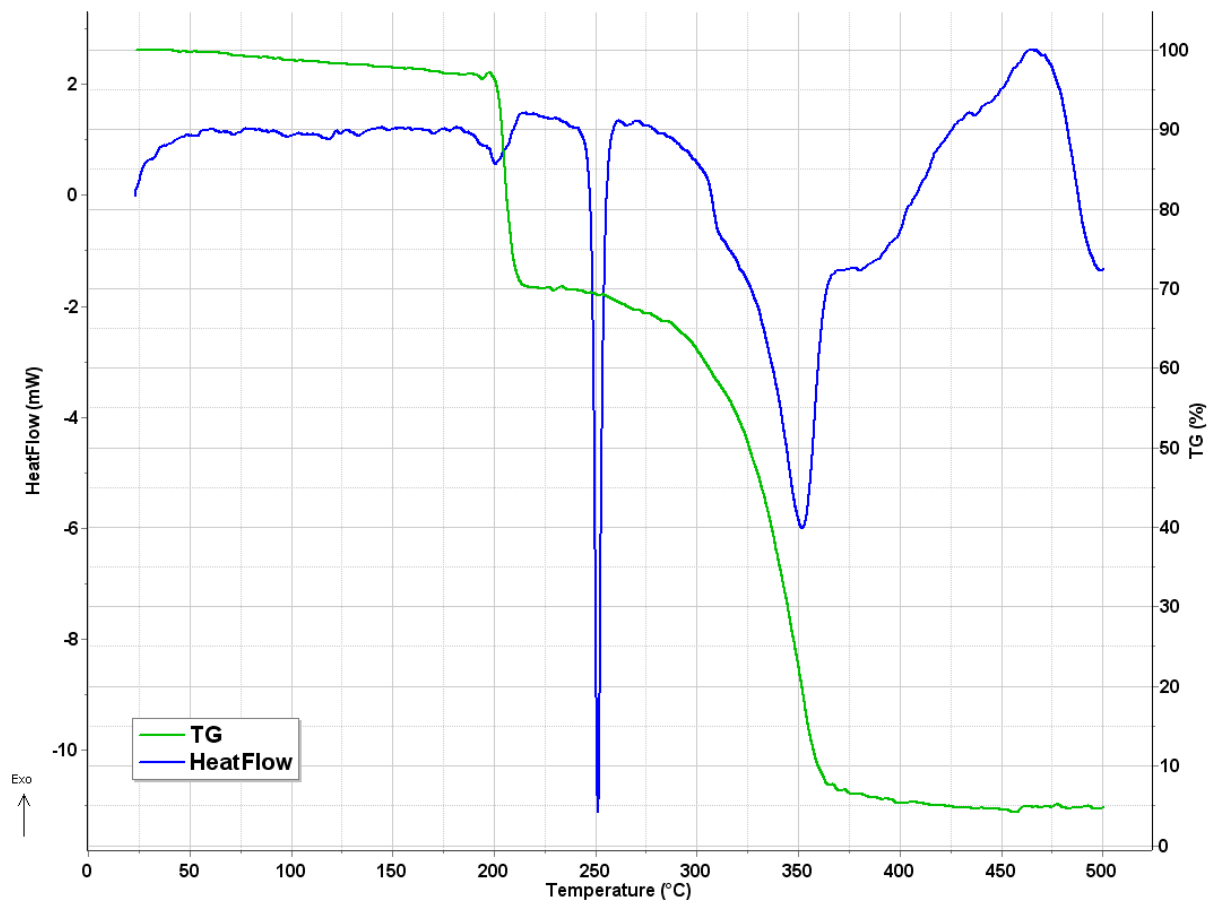

**Figure S23.** TG and DSC curves of compound **2** in inert atmosphere.



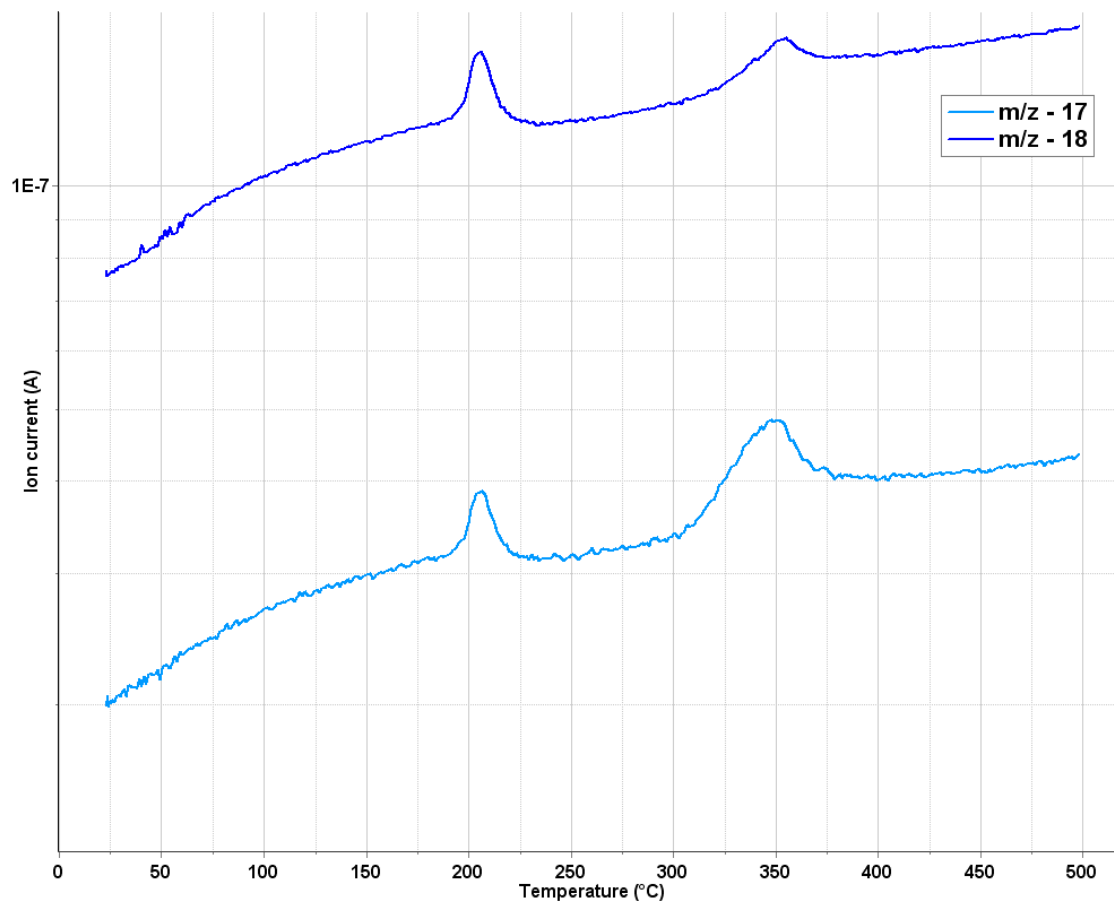

**Figure S24.** TG -MS curves of the water fragments measured during thermal decomposition of compound **2** under inert atmosphere.

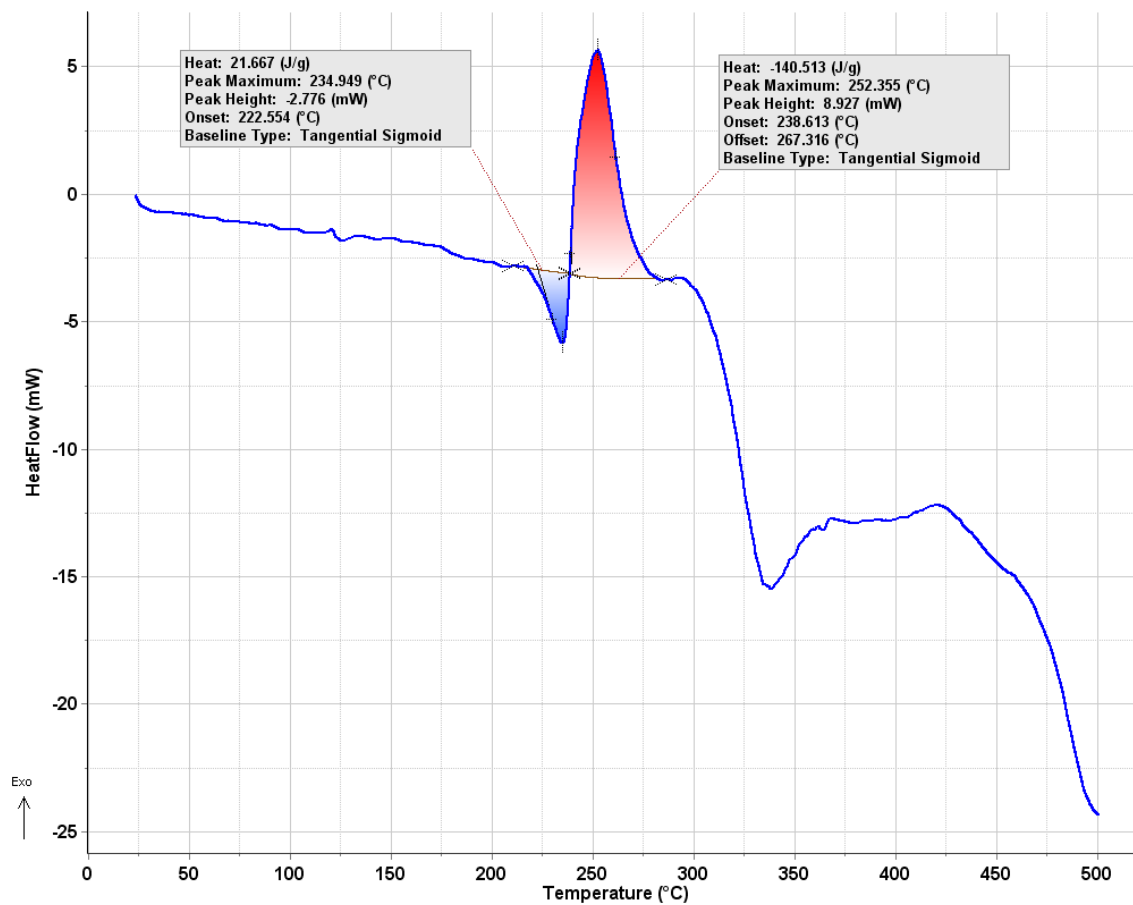

Figure S25. DSC results of compound 7 in inert atmosphere.

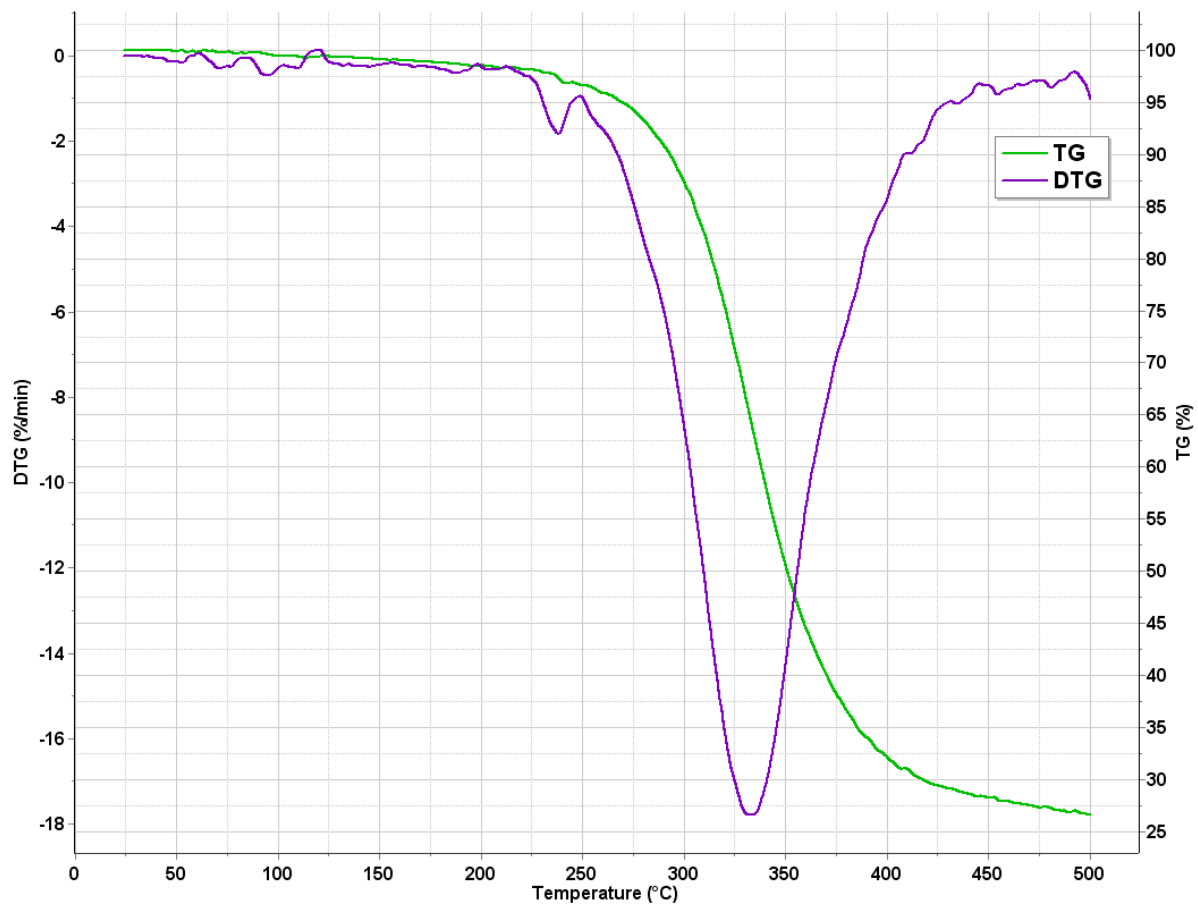

**Figure S26.** TG and DTG curves of compound **7** in synthetic air atmosphere.

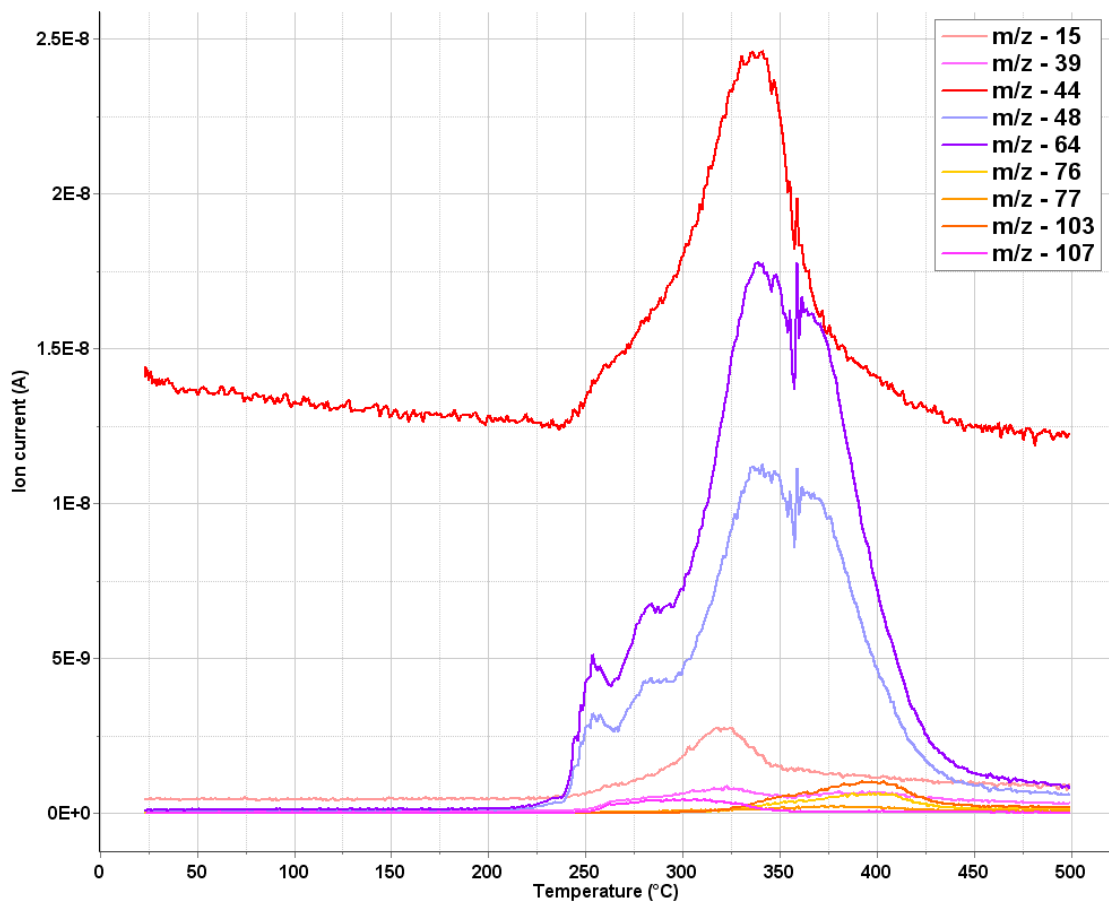

**Figure S27.** TG -MS curves of the fragments measured during thermal decomposition of compound **7** under inert atmosphere. The  $m/z=64$  shows the mass of  $\text{SO}_2$  as one of the products of degradation.

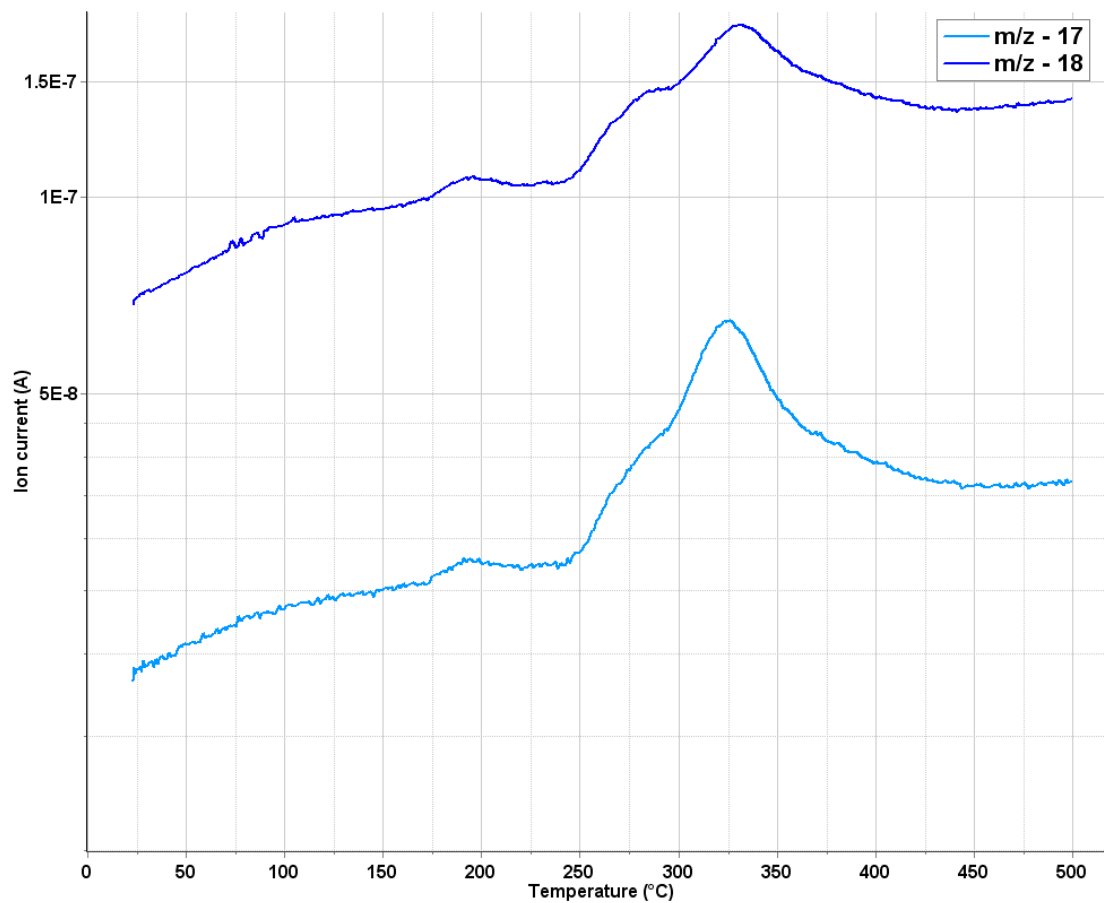

**Figure S28.** TG -MS curves of the water fragments measured during thermal decomposition of compound **7** under inert atmosphere.

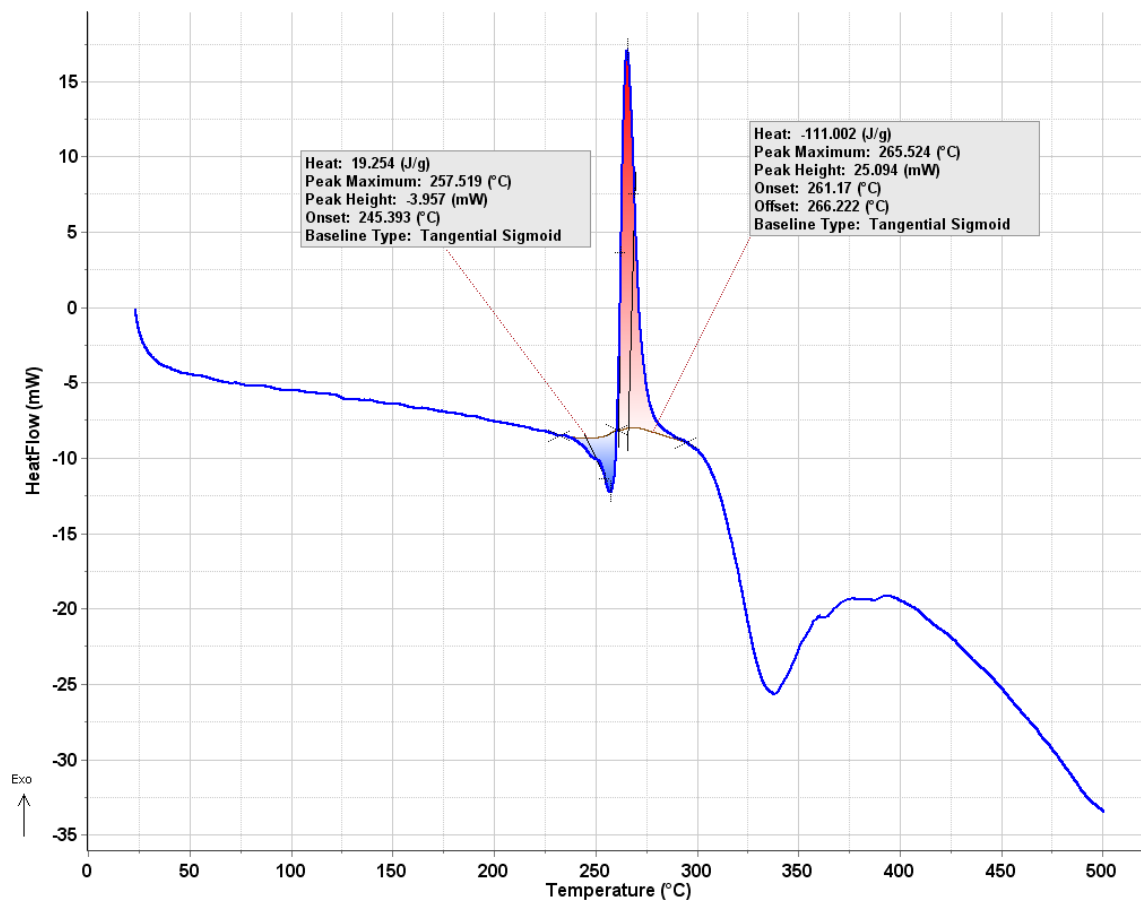

Figure S29. DSC curve of compound **8** in inert atmosphere.

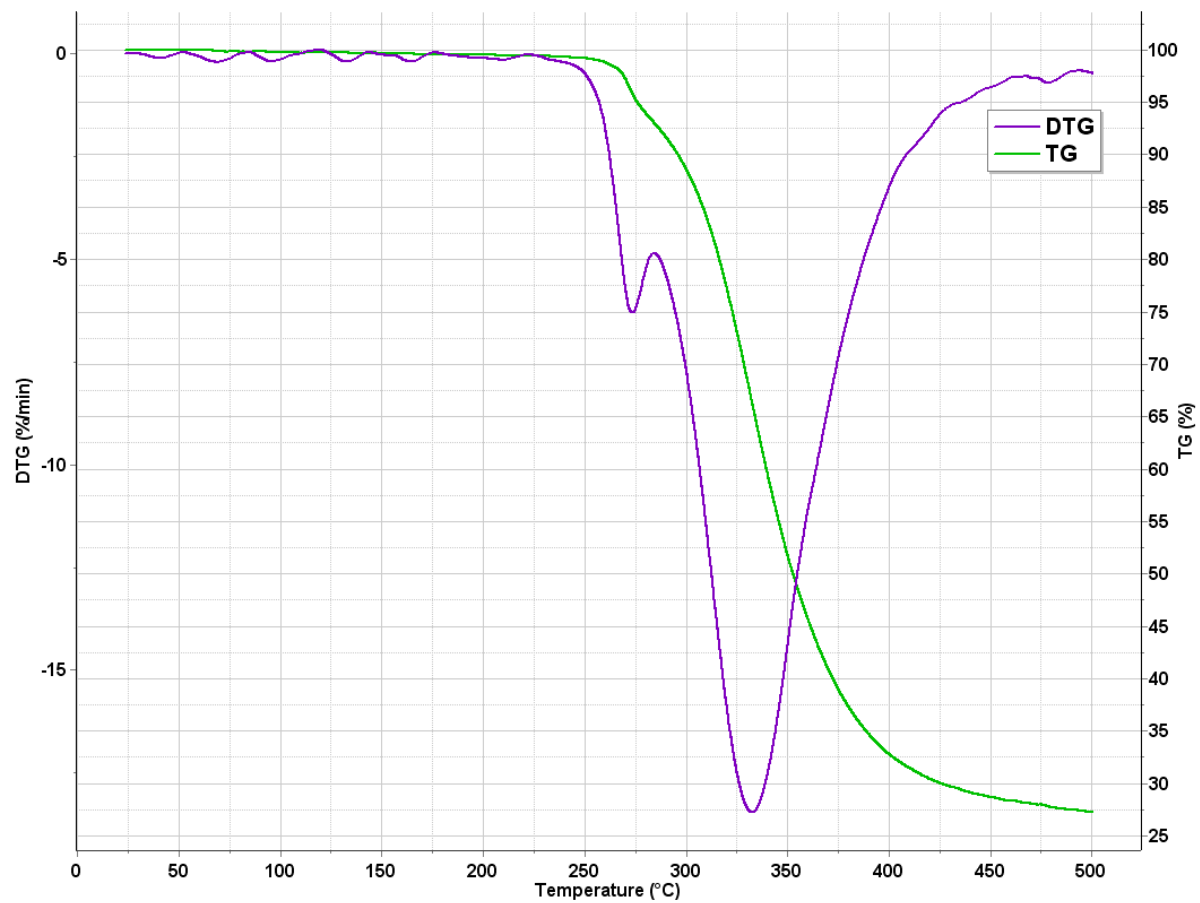

**Figure S30.** TG and DTG curves of compound **8** in synthetic air atmosphere.

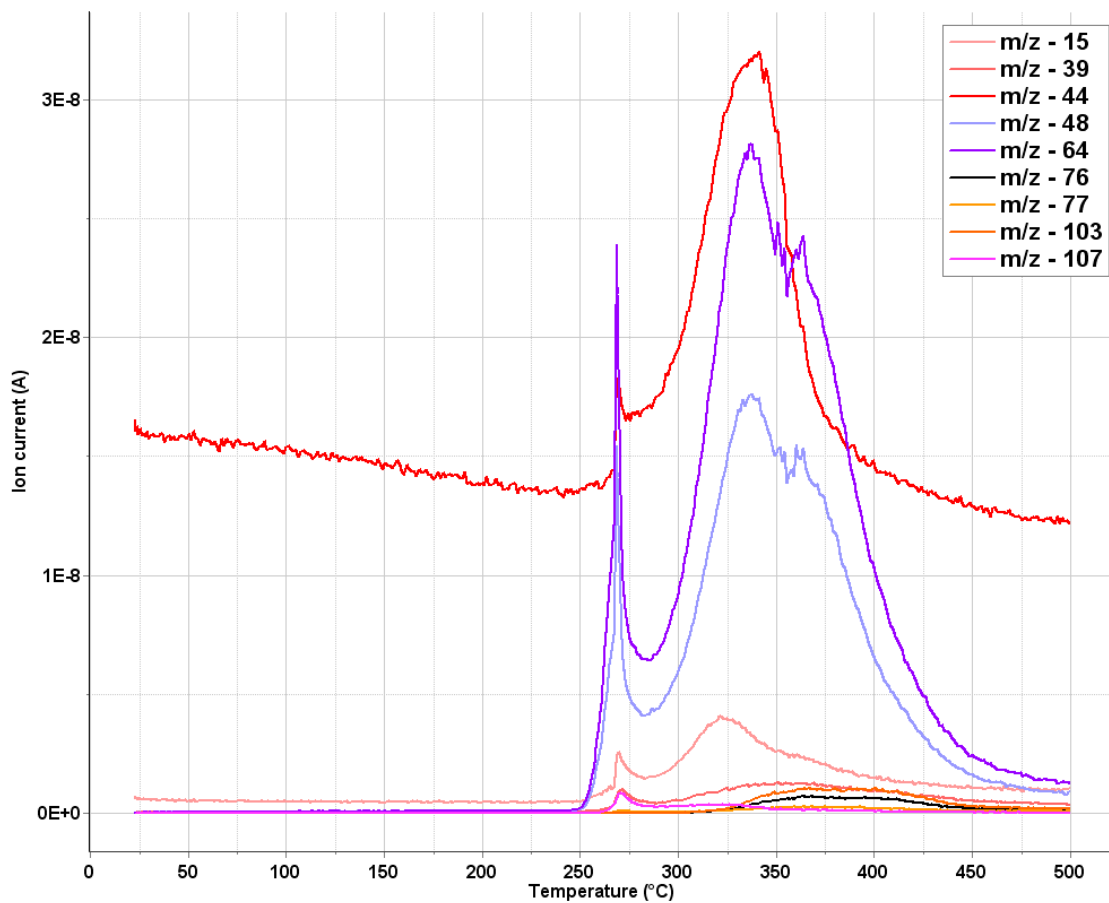

**Figure S31.** TG -MS curves of the fragments measured during thermal decomposition of compound **8** under inert atmosphere. The  $m/z=64$  shows the mass of  $\text{SO}_2$  as one of the products of degradation.



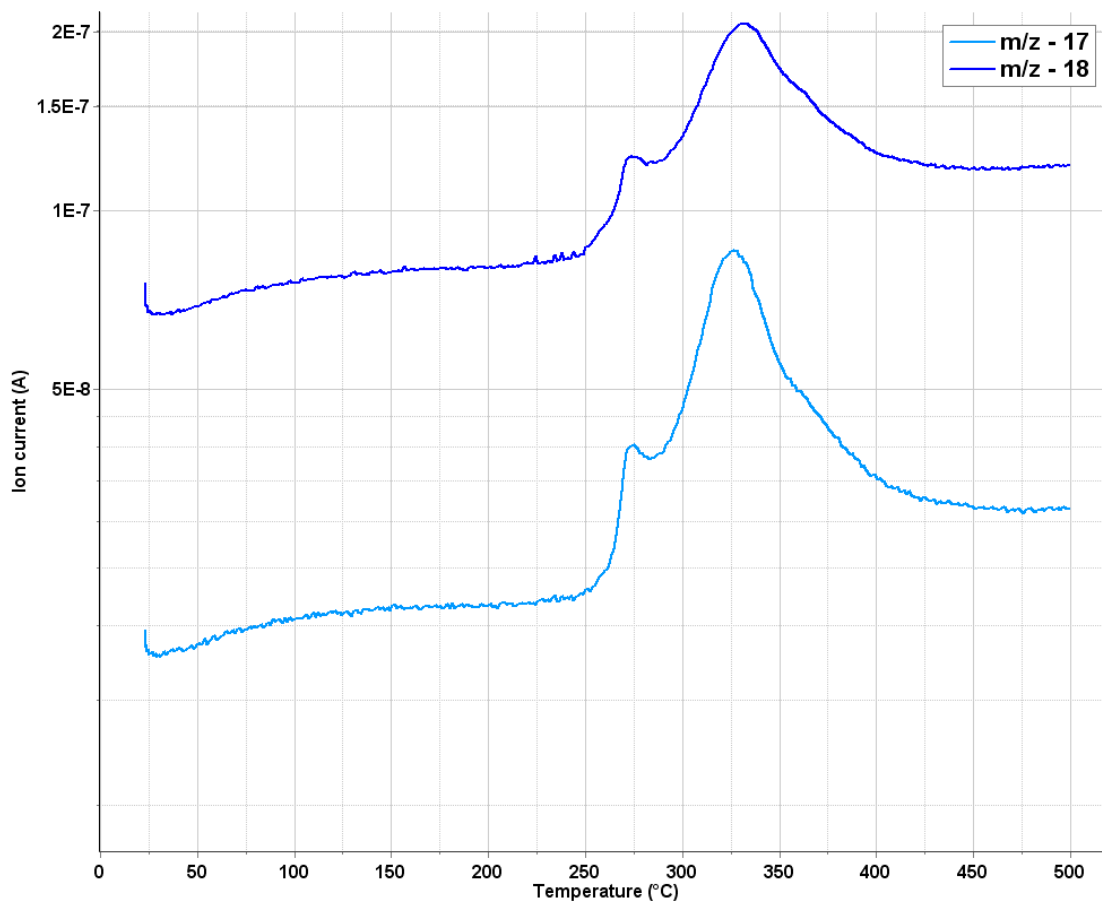

**Figure S32.** TG -MS curves of the water fragments measured during thermal decomposition of compound **8** under inert atmosphere.
